# Supplementary material
Source: publisher site journal article supplement (https://www.dovepress.com/article/584478)
Supplement: Supplementary file 1 [file 584478%20Supplementary%20Material.pdf]

## CONTENTS

### PRISMA Checklist

The page numbers in this document refer to the originally submitted manuscript, available at <https://www.medrxiv.org/content/10.64898/2025.12.30.25343217v1> (Reference #32)

### Supplemental Tables and Materials

**Supp. Table S1. Reports of the interpupillary distance (IPD) in different populations/regions.**

**Supp. Table S2. Esotropia/exotropia (ET/XT) ratio in different populations/regions.**

**Supp. Table S3: Pairs of ET/XT ratio and IPD within populations for regression analysis**

**Supp. Table S4: Random pooled estimates of mean IPDs for major ethnicities with 95% confidence intervals (N=222 studies)**

**Supp. Material S1: List of References for the ET/XT ratio (from von Bartheld et al., 2025)<sup>22</sup>**

## PRISMA 2020 Checklist

| Section and Topic             | Item # | Checklist item                                                                                                                                                                                                                                                                                       | Location where item is reported |
|-------------------------------|--------|------------------------------------------------------------------------------------------------------------------------------------------------------------------------------------------------------------------------------------------------------------------------------------------------------|---------------------------------|
| <b>TITLE</b>                  |        |                                                                                                                                                                                                                                                                                                      |                                 |
| Title                         | 1      | Identify the report as a systematic review.                                                                                                                                                                                                                                                          | 1                               |
| <b>ABSTRACT</b>               |        |                                                                                                                                                                                                                                                                                                      |                                 |
| Abstract                      | 2      | See the PRISMA 2020 for Abstracts checklist.                                                                                                                                                                                                                                                         | 2                               |
| <b>INTRODUCTION</b>           |        |                                                                                                                                                                                                                                                                                                      |                                 |
| Rationale                     | 3      | Describe the rationale for the review in the context of existing knowledge.                                                                                                                                                                                                                          | 2,3                             |
| Objectives                    | 4      | Provide an explicit statement of the objective(s) or question(s) the review addresses.                                                                                                                                                                                                               | 2,4                             |
| <b>METHODS</b>                |        |                                                                                                                                                                                                                                                                                                      |                                 |
| Eligibility criteria          | 5      | Specify the inclusion and exclusion criteria for the review and how studies were grouped for the syntheses.                                                                                                                                                                                          | 4                               |
| Information sources           | 6      | Specify all databases, registers, websites, organisations, reference lists and other sources searched or consulted to identify studies. Specify the date when each source was last searched or consulted.                                                                                            | 4                               |
| Search strategy               | 7      | Present the full search strategies for all databases, registers and websites, including any filters and limits used.                                                                                                                                                                                 | 4,49                            |
| Selection process             | 8      | Specify the methods used to decide whether a study met the inclusion criteria of the review, including how many reviewers screened each record and each report retrieved, whether they worked independently, and if applicable, details of automation tools used in the process.                     | 4                               |
| Data collection process       | 9      | Specify the methods used to collect data from reports, including how many reviewers collected data from each report, whether they worked independently, any processes for obtaining or confirming data from study investigators, and if applicable, details of automation tools used in the process. | 4,49                            |
| Data items                    | 10a    | List and define all outcomes for which data were sought. Specify whether all results that were compatible with each outcome domain in each study were sought (e.g. for all measures, time points, analyses), and if not, the methods used to decide which results to collect.                        | 4                               |
|                               | 10b    | List and define all other variables for which data were sought (e.g. participant and intervention characteristics, funding sources). Describe any assumptions made about any missing or unclear information.                                                                                         | 5                               |
| Study risk of bias assessment | 11     | Specify the methods used to assess risk of bias in the included studies, including details of the tool(s) used, how many reviewers assessed each study and whether they worked independently, and if applicable, details of automation tools used in the process.                                    | 4                               |
| Effect measures               | 12     | Specify for each outcome the effect measure(s) (e.g. risk ratio, mean difference) used in the synthesis or presentation of results.                                                                                                                                                                  | 5-6                             |
| Synthesis methods             | 13a    | Describe the processes used to decide which studies were eligible for each synthesis (e.g. tabulating the study intervention characteristics and comparing against the planned groups for each synthesis (item #5)).                                                                                 | 4,6,S40                         |
|                               | 13b    | Describe any methods required to prepare the data for presentation or synthesis, such as handling of missing summary statistics, or data conversions.                                                                                                                                                | 5-6, S1,S9                      |
|                               | 13c    | Describe any methods used to tabulate or visually display results of individual studies and syntheses.                                                                                                                                                                                               | 4-5, 50-55                      |
|                               | 13d    | Describe any methods used to synthesize results and provide a rationale for the choice(s). If meta-analysis was performed, describe the model(s), method(s) to identify the presence and extent of statistical heterogeneity, and software package(s) used.                                          | 5-6, S40                        |
|                               | 13e    | Describe any methods used to explore possible causes of heterogeneity among study results (e.g. subgroup analysis, meta-regression).                                                                                                                                                                 | 5-6, 11, 54-55                  |
|                               | 13f    | Describe any sensitivity analyses conducted to assess robustness of the synthesized results.                                                                                                                                                                                                         | N/A                             |

## PRISMA 2020 Checklist

| Section and Topic             | Item # | Checklist item                                                                                                                                                                                                                                                                       | Location where item is reported |
|-------------------------------|--------|--------------------------------------------------------------------------------------------------------------------------------------------------------------------------------------------------------------------------------------------------------------------------------------|---------------------------------|
| Reporting bias assessment     | 14     | Describe any methods used to assess risk of bias due to missing results in a synthesis (arising from reporting biases).                                                                                                                                                              | N/A                             |
| Certainty assessment          | 15     | Describe any methods used to assess certainty (or confidence) in the body of evidence for an outcome.                                                                                                                                                                                | N/A                             |
| <b>RESULTS</b>                |        |                                                                                                                                                                                                                                                                                      |                                 |
| Study selection               | 16a    | Describe the results of the search and selection process, from the number of records identified in the search to the number of studies included in the review, ideally using a flow diagram.                                                                                         | 49                              |
|                               | 16b    | Cite studies that might appear to meet the inclusion criteria, but which were excluded, and explain why they were excluded.                                                                                                                                                          | 4                               |
| Study characteristics         | 17     | Cite each included study and present its characteristics.                                                                                                                                                                                                                            | 16-48, S1-S32                   |
| Risk of bias in studies       | 18     | Present assessments of risk of bias for each included study.                                                                                                                                                                                                                         | N/A                             |
| Results of individual studies | 19     | For all outcomes, present, for each study: (a) summary statistics for each group (where appropriate) and (b) an effect estimate and its precision (e.g. confidence/credible interval), ideally using structured tables or plots.                                                     | S1-S17                          |
| Results of syntheses          | 20a    | For each synthesis, briefly summarise the characteristics and risk of bias among contributing studies.                                                                                                                                                                               | 6-8, 9-11                       |
|                               | 20b    | Present results of all statistical syntheses conducted. If meta-analysis was done, present for each the summary estimate and its precision (e.g. confidence/credible interval) and measures of statistical heterogeneity. If comparing groups, describe the direction of the effect. | 8-9, S40                        |
|                               | 20c    | Present results of all investigations of possible causes of heterogeneity among study results.                                                                                                                                                                                       | 13                              |
|                               | 20d    | Present results of all sensitivity analyses conducted to assess the robustness of the synthesized results.                                                                                                                                                                           | 8-9                             |
| Reporting biases              | 21     | Present assessments of risk of bias due to missing results (arising from reporting biases) for each synthesis assessed.                                                                                                                                                              | N/A                             |
| Certainty of evidence         | 22     | Present assessments of certainty (or confidence) in the body of evidence for each outcome assessed.                                                                                                                                                                                  | 8-9, S40                        |
| <b>DISCUSSION</b>             |        |                                                                                                                                                                                                                                                                                      |                                 |
| Discussion                    | 23a    | Provide a general interpretation of the results in the context of other evidence.                                                                                                                                                                                                    | 11-15                           |
|                               | 23b    | Discuss any limitations of the evidence included in the review.                                                                                                                                                                                                                      | 15                              |
|                               | 23c    | Discuss any limitations of the review processes used.                                                                                                                                                                                                                                | 15                              |
|                               | 23d    | Discuss implications of the results for practice, policy, and future research.                                                                                                                                                                                                       | 11-13, 15                       |
| <b>OTHER INFORMATION</b>      |        |                                                                                                                                                                                                                                                                                      |                                 |
| Registration and protocol     | 24a    | Provide registration information for the review, including register name and registration number, or state that the review was not registered.                                                                                                                                       | N/A                             |
|                               | 24b    | Indicate where the review protocol can be accessed, or state that a protocol was not prepared.                                                                                                                                                                                       | N/A                             |
|                               | 24c    | Describe and explain any amendments to information provided at registration or in the protocol.                                                                                                                                                                                      | N/A                             |
| Support                       | 25     | Describe sources of financial or non-financial support for the review, and the role of the funders or sponsors in the review.                                                                                                                                                        | 16                              |
| Competing interests           | 26     | Declare any competing interests of review authors.                                                                                                                                                                                                                                   | 16                              |

## PRISMA 2020 Checklist

| Section and Topic                              | Item # | Checklist item                                                                                                                                                                                                                             | Location where item is reported |
|------------------------------------------------|--------|--------------------------------------------------------------------------------------------------------------------------------------------------------------------------------------------------------------------------------------------|---------------------------------|
| Availability of data, code and other materials | 27     | Report which of the following are publicly available and where they can be found: template data collection forms; data extracted from included studies; data used for all analyses; analytic code; any other materials used in the review. | 16-48, S1-S39                   |

## SUPPLEMENTAL TABLES AND MATERIALS

**Supplemental Table S1. Reports of the interpupillary distance (IPD) in different populations/regions.**

| First Author  | Ref # | Year         | Ethnicity/Region           | Comments    | Cohort size | Male         | Female       | Mean         |
|---------------|-------|--------------|----------------------------|-------------|-------------|--------------|--------------|--------------|
| <b>EUROPE</b> |       |              |                            | M=F+2.3     |             |              |              |              |
| Becker        | 58    | 1861         | Heidelberg, Germany        | c/o Beselin | 370         | <b>60.1</b>  | <b>57.5</b>  | 58.8         |
| Pflüger       | 59    | 1875         | Luzerne, Switzerland       |             | 214         | <b>62.0</b>  | <b>59.2</b>  | 61.4         |
| Holmgren      | 60    | 1879         | Upsala, Sweden             |             | 191         | <b>62.6</b>  | <b>61.5</b>  | 62.1         |
| Beselin       | 61    | 1885         | Heidelberg, Germany        |             | 8           | 63.1         | <b>60.8</b>  | 61.95        |
| Seggel        | 62    | 1904         | German soldiers            |             | 5,000       | <b>62.2</b>  | 59.8         | 61.0         |
| Seggel        | 62    | 1904         | Munich, Germany            |             | 700         | <b>62.5</b>  | <b>61.5</b>  | 62.0         |
| Speidel       | 63    | 1905         | Tubingen, Germany          |             | 472         | <b>62.4</b>  | 60.1         | 61.25        |
| Helmbold      | 64    | 1914         | Germany                    |             | 300         | <b>65.2</b>  | <b>62.1</b>  | 63.7         |
| Helmbold      | 64    | 1914         | Eastern Germany            |             | 225         | <b>64.1</b>  | <b>61.1</b>  | 62.6         |
| Koegel        | 65    | 1914<br>1916 | Belarus                    |             | 296         | <b>65.2</b>  | 62.9         | 64.05        |
| Koegel        | 66    | 1914         | East-Central Russia        |             | 300         | <b>64.5</b>  | 62.2         | 63.35        |
| Koegel        | 66    | 1914         | Ukraine                    |             | 300         | <b>64.9</b>  | 62.6         | 63.75        |
| Koegel        | 66    | 1914         | Tatarstan, Russia          | Tatars      | 300         | <b>63.7</b>  | 61.4         | 62.55        |
| Guenther      | 1     | 1933         | Saxony, Germany            |             | 100         | <b>65.8</b>  | 63.5         | 64.65        |
| Bertelsen     | 67    | 1954         | Copenhagen, Denmark        |             | 249         | <b>62.06</b> | <b>59.85</b> | <b>60.81</b> |
| Kerwood       | 68    | 1954         | Eastern England, UK        |             | 200         | <b>64.3</b>  | <b>60.6</b>  | 62.45        |
| Babalola      | 69    | 1960         | UK                         |             | 40          | <b>64.7</b>  | 62.4         | 63.55        |
| Kisling       | 70    | 1966         | Copenhagen, Denmark        |             | 102         | <b>61.0</b>  | 58.7         | 59.85        |
| Garrett       | 71    | 1971         | France                     | Pilots      | 820         | <b>62.3</b>  | 60.0         | 61.15        |
| Bruckner      | 72    | 1986         | Basel, Switzerland         |             | 11          | <b>65.16</b> | 62.86        | 62.83        |
| Fledelius     | 37    | 1986         | Hillerod, Denmark          |             | 203         | <b>65.9</b>  | <b>62.9</b>  | 64.4         |
| Jonasson      | 73    | 1987         | Iceland                    |             | 555         | 61.85        | 59.55        | <b>60.7</b>  |
| Mon-Williams  | 12    | 1993         | Scotland                   |             | 20          | 62.15        | 59.85        | <b>61.0</b>  |
| Howarth       | 74    | 1999         | Leicestershire, UK         |             | 41          | <b>64.0</b>  | <b>61.0</b>  | 62.5         |
| Pointer       | 75    | 1999         | Northampton, UK            |             | 900         | <b>64.8</b>  | <b>61.7</b>  | 63.3         |
| Pointer       | 75    | 1999         | Northampton, UK            |             | 900         | <b>65.5</b>  | <b>62.6</b>  | 64.1         |
| Filipovic     | 76    | 2003         | Croatia                    |             | 200         | 64.15        | 61.85        | <b>63.0</b>  |
| Wilkinson     | 77    | 2003         | Manchester, UK             |             | 95          | <b>60.8</b>  | <b>58.5</b>  | 59.7         |
| Mommaerts     | 78    | 2008         | Belgium                    |             | 50          | <b>60.6</b>  | <b>59.4</b>  | 60.0         |
| Pointer       | 9     | 2012         | Northampton, UK            |             | 1,354       | <b>65.3</b>  | <b>62.3</b>  | 63.8         |
| Garcia-Lazaro | 79    | 2014         | Valencia, Spain            |             | 38          | 64.3         | 61.9         | <b>63.1</b>  |
| Lupon-Bas     | 80    | 2014         | Barcelona, Spain           |             | 5           | 63.15        | 60.85        | <b>62.0</b>  |
| Zilch         | 13    | 2014         | Hamburg, Germany           |             | 15          | 67.25        | 64.95        | <b>66.1</b>  |
| Hakala        | 81    | 2016         | Espoo, Finland             |             | 40          | 61.55        | 59.25        | <b>60.4</b>  |
| Mestre        | 14    | 2016         | Marseille, France          |             | 20          | <b>64.1</b>  | 61.78        | 62.95        |
| Flament       | 82    | 2020         | Paris, Montpellier, France |             | 581         | 65.3         | <b>63.0</b>  | 64.15        |
| Knezi         | 83    | 2020         | Serbia                     |             | 90          | <b>60.3</b>  | <b>60.8</b>  | 60.5         |
| Schuetz       | 17    | 2022         | Giessen, Germany           |             | 18          | 62.25        | 59.95        | <b>61.1</b>  |
| Tsiogka       | 84    | 2023         | Athens, Greece             |             | 400         | 62.15        | 59.85        | <b>61.0</b>  |

|                                           |     |      |                                           |          |       |              |              |              |
|-------------------------------------------|-----|------|-------------------------------------------|----------|-------|--------------|--------------|--------------|
| <b>DOWN SYNDROME</b>                      |     |      |                                           | M=F-2.4  |       |              |              |              |
| Brushfield                                | 85  | 1924 | London, UK                                |          | 84    | <b>50</b>    | <b>54</b>    | 52           |
| Vontobel                                  | 54  | 1933 | Zurich, Switzerland                       |          | 10    | 49.5         | 51.9         | <b>50.7</b>  |
| Lowe                                      | 86  | 1949 | London, UK                                |          | 17    | 53.8         | 56.2         | <b>55</b>    |
| Kerwood                                   | 68  | 1954 | Eastern England, UK                       |          | 33    | <b>54.6</b>  | <b>55.4</b>  | 55.0         |
| Kisling                                   | 70  | 1966 | Denmark (South)                           |          | 71    | <b>54.2</b>  | 56.6         | 55.4         |
| Missiroli                                 | 55  | 1970 | Rome, Italy                               |          | 15    | <b>59.2</b>  | 61.6         | 60.4         |
| Woodhouse                                 | 56  | 1994 | Cardiff, Wales                            |          | 8     | 48.8         | 51.2         | <b>50</b>    |
| Doyle                                     | 87  | 2016 | Ulster, UK                                |          | 7     | <b>53.2</b>  | 55.6         | 54.4         |
| <b>INUIT (ESKIMO)</b>                     |     |      |                                           |          |       |              |              |              |
| Skeller                                   | 88  | 1954 | Tasiilaq, S. Greenland                    |          | 76    | <b>60.26</b> | <b>58.67</b> | 59.47        |
| <b>AFRICA – WEST</b>                      |     |      |                                           |          |       |              |              |              |
|                                           |     |      |                                           | M=F+2.27 |       |              |              |              |
| Babalola                                  | 69  | 1960 | West Africa                               |          | 40    | <b>69.64</b> | 67.5         | 68.5         |
| Kikudi                                    | 30  | 1988 | Kinshasa, Zaire                           |          | 100   | 67.15        | 64.85        | <b>66</b>    |
| Kaimbo                                    | 89  | 1994 | Kinshasa, Zaire                           |          | 11    | <b>70.25</b> | <b>65.3</b>  | <b>67.8</b>  |
| Umar                                      | 90  | 2005 | Jos, Central Nigeria                      |          | 213   | <b>89</b>    | 86.7         | 87.85        |
| Ilechie                                   | 91  | 2010 | Cape Coast, Ghana                         |          | 400   | <b>69.6</b>  | <b>66.3</b>  | <b>68</b>    |
| Oladipo                                   | 92  | 2010 | Bayelsa State, Nigeria                    | Ijaw     | 1,000 | <b>69.60</b> | <b>66.64</b> | <b>68.1</b>  |
| Osunwoke                                  | 93  | 2010 | Enugu-Owerri, Nigeria                     | Igbo     | 1,000 | <b>74.9</b>  | <b>74.5</b>  | <b>74.7</b>  |
| Esomonu                                   | 94  | 2012 | Enugu-Owerri, Nigeria                     | Igbo     | 2,000 | <b>74.25</b> | <b>74.2</b>  | 74.2         |
| Osunwoke                                  | 42  | 2012 | Port Harcourt, Nigeria                    | Ijaw     | 175   | <b>65.08</b> | <b>65.01</b> | 65.05        |
| Kumah                                     | 95  | 2016 | Kumasi, Ghana                             |          | 302   | <b>66.2</b>  | <b>65.2</b>  | <b>65.7</b>  |
| Omodele                                   | 96  | 2016 | Yoruba, Nigeria                           |          | 1,274 | <b>68.8</b>  | <b>66.58</b> | <b>67.7</b>  |
| Usman                                     | 97  | 2016 | North-Eastern Nigeria                     | Bura     | 300   | <b>69.6</b>  | <b>68.0</b>  | <b>69.0</b>  |
| Adekunle                                  | 98  | 2021 | Lagos, Nigeria                            | Yoruba   | 325   | <b>68.19</b> | <b>65.35</b> | <b>66.99</b> |
| Adekunle                                  | 98  | 2021 | Lagos, Nigeria                            | Igbo     | 80    | <b>68.36</b> | <b>66.24</b> | <b>67.34</b> |
| Adekunle                                  | 98  | 2021 | Lagos, Nigeria                            | Hausa    | 50    | <b>66.86</b> | <b>63.41</b> | <b>66.73</b> |
| Adekunle                                  | 98  | 2021 | Lagos, Nigeria                            | other    | 48    | 68.23        | 65.96        | <b>67.09</b> |
| Adekunle                                  | 99  | 2022 | Lagos, Nigeria                            |          | 452   | <b>69.63</b> | <b>65.54</b> | <b>67.85</b> |
| Soumboundou                               | 100 | 2023 | Dakar, Senegal                            |          | 104   | <b>61.9</b>  | <b>59.9</b>  | 60.9         |
| <b>DOWN SYNDROME</b>                      |     |      |                                           |          |       |              |              |              |
| Adio                                      | 101 | 2012 | Port Harcourt, Nigeria                    |          | 42    |              |              | <b>59.5</b>  |
| <b>AFRICA – NORTHEAST, CENTRAL, SOUTH</b> |     |      |                                           | M=F+2.4  |       |              |              |              |
| Ried                                      | 102 | 1915 | Congo, Tanganyika                         |          | 37    | <b>68</b>    | <b>63.3</b>  | 65.65        |
| El-Mokadem                                | 103 | 1987 | Egypt                                     |          | 2,600 | <b>63.4</b>  | <b>60</b>    | <b>61.7</b>  |
| Rasengane                                 | 104 | 2001 | Johannesburg, South Africa                |          | 200   | 68.1         | 65.9         | <b>67</b>    |
| McAlister                                 | 105 | 2002 | Uganda (Army)                             |          | 104   | <b>67.4</b>  | 65.0         | 66.2         |
| Ruiz-Alcocer                              | 106 | 2011 | Maputo, Mozambique                        |          | 423   | <b>68.1</b>  | <b>67.4</b>  | <b>67.8</b>  |
| Siraj                                     | 107 | 2017 | Khartoum, Sudan                           |          | 920   | <b>63.0</b>  | <b>61.57</b> | <b>62.3</b>  |
| Halladay                                  | 108 | 2019 | Malawi                                    |          | 179   | <b>68.6</b>  | <b>65.6</b>  | <b>67.8</b>  |
| Elrazky                                   | 109 | 2020 | Cairo, Egypt                              |          | 83    | 65.7         | 61.3         | <b>63.5</b>  |
| Flament                                   | 82  | 2020 | Johannesburg, South Africa                |          | 315   | 71.1         | <b>68.7</b>  | 69.9         |
| Mhaleni                                   | 110 | 2021 | Polokwane, Limpopo Province, South Africa |          | 386   | <b>68</b>    | <b>66.5</b>  | <b>67.3</b>  |
| Samuel                                    | 111 | 2021 | Mashonaland, Zimbabwe                     | Shona    | 471   | <b>66.4</b>  | <b>65.0</b>  | <b>65.7</b>  |

| <b>MIDDLE EAST</b>            |     |      |                             | M=F+2.44       |       |              |              |              |
|-------------------------------|-----|------|-----------------------------|----------------|-------|--------------|--------------|--------------|
| Osuobeni                      | 112 | 1993 | Riyadh, Saudi Arabia        |                | 353   | 63.4         | <b>60.9</b>  | 62.15        |
| Osuobeni                      | 113 | 1994 | Riyadh, Saudi Arabia        |                | 198   | <b>63.38</b> | 60.94        | 62.16        |
| Al-El-Sheikh                  | 114 | 1998 | Riyadh, Saudi Arabia        |                | 163   | <b>64.9</b>  | <b>59.4</b>  | <b>62.15</b> |
| Evereklioglu                  | 115 | 1999 | Malatya, Turkey             |                | 1,404 | <b>63.7</b>  | <b>61.5</b>  | <b>62.6</b>  |
| Evereklioglu                  | 116 | 2002 | Malatya, Turkey             |                | 1,414 | <b>63.7</b>  | <b>61.5</b>  | <b>62.6</b>  |
| Bozkir                        | 117 | 2003 | Adana, Turkey               |                | 1,404 | <b>63.9</b>  | <b>60.8</b>  | <b>62.3</b>  |
| Kassab                        | 118 | 2005 | Mosul, Iraq                 |                | 100   | <b>64.9</b>  | <b>59.4</b>  | 62.15        |
| Bayani                        | 119 | 2006 | Tehran, Iran                |                | 400   | <b>65</b>    | <b>63</b>    | <b>64</b>    |
| Ozturk                        | 120 | 2006 | Afyon, Turkey (West)        |                | 261   | <b>61.4</b>  | <b>61.0</b>  | <b>61.2</b>  |
| Beden                         | 121 | 2008 | Samsun, Turkey              |                | 2,477 | 64.2         | 61.76        | <b>62.98</b> |
| Ozsoy                         | 122 | 2009 | Antalya, Turkey             |                | 70    | 64.25        | 61.75        | <b>63.0</b>  |
| Aksu                          | 123 | 2010 | Ankara, Turkey              |                | 100   | <b>48.3</b>  | <b>51.4</b>  | <b>49.9</b>  |
| Mahdavihzadi                  | 124 | 2010 | Mashhad, Iran               |                | 100   | 63.54        | 60.88        | <b>62.1</b>  |
| Fesharaki                     | 125 | 2012 | Isfahan, Iran               |                | 947   | <b>63.6</b>  | <b>61.1</b>  | <b>62.4</b>  |
| Alanazi                       | 126 | 2013 | Riyadh, Saudi Arabia        |                | 133   | <b>62.65</b> |              | 61.40        |
| Aslankurt                     | 127 | 2013 | Kahramanmaras, Turkey       |                | 120   | <b>64.4</b>  | <b>61.3</b>  | 62.85        |
| Gudek                         | 128 | 2015 | Samsun, Turkey              |                | 115   | <b>61.7</b>  | <b>59.0</b>  | <b>60.4</b>  |
| Ilhan                         | 10  | 2015 | Kayseri, Turkey             |                | 1,002 | 61.12        | 58.68        | <b>59.9</b>  |
| Yildirim                      | 129 | 2015 | Istanbul, Turkey            |                | 756   | <b>63.9</b>  | <b>61.4</b>  | <b>62.7</b>  |
| Al-Kaisy                      | 130 | 2016 | Kurds in Iraq               |                | 65    | 59.82        | 57.38        | <b>58.6</b>  |
| Direk                         | 131 | 2016 | Sanliurfa, Turkey           |                | 311   | 66.64        | <b>64.2</b>  | 65.42        |
| Moravej                       | 132 | 2017 | Tehran (W), Iran            |                | 487   | 61.44        | <b>59</b>    | 60.22        |
| Ozdemir                       | 133 | 2017 | Bursa, Turkey               |                | 172   | <b>59.3</b>  | <b>57.5</b>  | <b>58.4</b>  |
| Majeed                        | 134 | 2018 | Abha, Saudi Arabia          |                | 228   | <b>65.87</b> | <b>57.79</b> | <b>61.9</b>  |
| Rabaji                        | 135 | 2019 | Tehran, Iran                |                | 24    | <b>66.03</b> | <b>64.60</b> | 65.32        |
| Sahbaz                        | 136 | 2020 | Azeri population            |                | 1,132 | <b>65</b>    | <b>62.7</b>  | <b>63.9</b>  |
| Sahbaz                        | 137 | 2021 | Azerbaijan                  |                | 700   | <b>66.0</b>  | <b>64.1</b>  | <b>65.05</b> |
| Bahsi                         | 138 | 2021 | Gaziantep, Turkey           |                | 200   | <b>67.6</b>  | <b>63.2</b>  | <b>65.4</b>  |
| Gantz                         | 139 | 2021 | Jerusalem, Israel           | Jews,<br>Arabs | 199   | <b>61.9</b>  | <b>60.0</b>  | <b>60.6</b>  |
| Sahbaz                        | 137 | 2021 | Istanbul, Turkey            |                | 700   | <b>63.1</b>  | <b>61.1</b>  | <b>62.1</b>  |
| Moradi                        | 140 | 2022 | Tehran, Iran                |                | 300   | <b>63.26</b> | <b>61.13</b> | <b>61.95</b> |
| Ozdemir                       | 141 | 2022 | Samsun, Turkey              |                | 80    | <b>66.15</b> | <b>65.21</b> | 65.68        |
| Alshamri                      | 142 | 2023 | Yemen                       |                | 150   | <b>60.8</b>  | <b>59.9</b>  | 60.35        |
| Hatipoglu                     | 143 | 2023 | Nigde, Turkey               |                | 57    | <b>64</b>    | <b>62</b>    | <b>63</b>    |
| Abbas                         | 144 | 2024 | Najaf, Iraq                 |                | 77    | 63.6         | 61.16        | <b>62.38</b> |
| Eltahir                       | 145 | 2024 | AL-Qassim, Saudi Arabia     |                | 56    | 60.53        | <b>58.09</b> | 59.31        |
| <b>SOUTH ASIA (NORTHWEST)</b> |     |      |                             | M=F+2.68       |       |              |              |              |
| Singh JR                      | 146 | 1983 | Amritsar, Punjab, India     |                | 71    | <b>59.1</b>  | <b>56.5</b>  | 57.8         |
| Gupta VP                      | 147 | 2003 | Delhi, India                |                | 1,516 | <b>58.5</b>  | <b>57</b>    | 57.8         |
| Bali                          | 148 | 2005 | Kinnaur/Lahaul-Spiti, India |                | 50    | 66.4         | 63.72        | <b>65.06</b> |
| Patil                         | 149 | 2011 | Nagpur, India               |                | 216   | <b>64.2</b>  | <b>63.1</b>  | 63.7         |
| Hussain                       | 150 | 2012 | Lahore, Pakistan            |                | 159   | <b>67.57</b> | <b>62.92</b> | 65.2         |
| Kini                          | 151 | 2012 | Loni, Maharashtra, India    |                | 70    | 63.34        | 60.66        | <b>62</b>    |
| Sharma                        | 152 | 2012 | Sundar Nagar, India         |                | 100   | <b>59.8</b>  | <b>57.6</b>  | 58.7         |
| Purkait R                     | 153 | 2013 | Sagar, India                |                | 116   | <b>60.7</b>  | <b>57.4</b>  | 59.1         |
| Ladda                         | 154 | 2014 | Loni, Maharashtra, India    |                | 400   | <b>61.1</b>  | <b>58.2</b>  | 59.65        |
| Shah                          | 43  | 2014 | Gujarat, India              |                | 1,696 | <b>61.5</b>  | <b>60</b>    | <b>61.25</b> |

|                                          |     |      |                                  |            |     |              |              |              |
|------------------------------------------|-----|------|----------------------------------|------------|-----|--------------|--------------|--------------|
| Nazir                                    | 155 | 2015 | Srinagar, Kashmir, India         |            | 60  | <b>63.5</b>  | <b>61.9</b>  | <b>62.0</b>  |
| Alkhaairy                                | 156 | 2016 | Karachi, Pakistan                |            | 500 | <b>61.9</b>  | <b>61.5</b>  | 61.7         |
| Gupta R                                  | 157 | 2016 | Shimla, Himachal Pradesh, India  |            | 40  | <b>67.9</b>  | <b>61</b>    | 64.5         |
| Arshad                                   | 158 | 2017 | Faisalabad, Pakistan             |            | 100 | 65.34        | 62.66        | <b>64.0</b>  |
| Ayoub                                    | 159 | 2017 | Kashmir, India                   |            | 60  | <b>60.2</b>  | <b>59.5</b>  | 59.85        |
| Bangar                                   | 160 | 2017 | Latur, Maharashtra, India        |            | 250 | <b>62.3</b>  | <b>61.5</b>  | 61.9         |
| Batool                                   | 161 | 2017 | Faisalabad, Pakistan             |            | 30  | 63.4         | 60.4         | <b>62.6</b>  |
| Shah DS                                  | 162 | 2017 | Gandhinagar, Gujarat, India      |            | 100 | <b>60.3</b>  | <b>58.79</b> | 59.55        |
| Saifullah                                | 163 | 2018 | Peshawar, Pakistan               |            | 100 | <b>63.7</b>  | <b>61.0</b>  | <b>62.3</b>  |
| Hayat                                    | 164 | 2019 | Karachi, Pakistan                |            | 499 | <b>62.7</b>  | <b>60.7</b>  | 61.7         |
| Rattan                                   | 165 | 2019 | Uttarakhand, India               |            | 100 | <b>59.4</b>  | <b>48.3</b>  | 53.9         |
| Gupta P                                  | 166 | 2020 | Bathinda, Punjab, India          |            | 200 | <b>67.2</b>  | <b>65.9</b>  | 66.5         |
| Dhinsa                                   | 167 | 2021 | Haryana, India                   |            | 100 | <b>54.6</b>  | <b>51.6</b>  | 53.1         |
| Sarathi                                  | 168 | 2021 | Gujarat+, India                  |            | 71  | 63.84        | 61.16        | <b>62.5</b>  |
| Bhalla                                   | 169 | 2022 | Chandigarh, India                |            | 45  | <b>61.9</b>  | <b>60.8</b>  | 61.35        |
| Ahmed                                    | 170 | 2022 | Karachi, Pakistan                |            | 230 | <b>66.62</b> | <b>71.72</b> | <b>69.23</b> |
| Malik                                    | 171 | 2022 | Lahore, Pakistan                 |            | 380 | <b>60.23</b> | <b>58.86</b> | <b>59.6</b>  |
| Poonia                                   | 172 | 2022 | Ahmedabad, India                 |            | 150 | 60.85        | 58.15        | <b>59.5</b>  |
| Kamboj                                   | 173 | 2023 | Haryana, India                   |            | 100 | <b>62.6</b>  | <b>61.55</b> | <b>62.05</b> |
| Maseedupalli                             | 11  | 2023 | Hyderabad, India                 |            | 455 | <b>62.8</b>  | <b>60.0</b>  | 61.4         |
| <b>DOWN SYNDROME</b>                     |     |      |                                  |            |     |              |              |              |
| Bhalla                                   | 57  | 2021 | Chandigarh, India                |            | 51  | <b>58.3</b>  | <b>58.0</b>  | 58.15        |
| <b>SOUTH ASIA (SOUTH, CENTRAL, EAST)</b> |     |      |                                  | M=F+3.07   |     |              |              |              |
| Anitha                                   | 174 | 2011 | Chennai, India                   |            | 100 | <b>64</b>    | <b>58</b>    | 61           |
| Packiriswamy                             | 175 | 2012 | Manipal, Karnataka, India        |            | 300 | <b>68.1</b>  | <b>63.6</b>  | 65.9         |
| Vasanthakumar                            | 176 | 2013 | Manipal, Karnataka, India        | Dravidians | 200 | <b>66.72</b> | <b>62.59</b> | 64.7         |
| Mostafa                                  | 177 | 2014 | Chittagong/Rangamati, Bangladesh | Buddhist   | 100 | 56.9         | <b>55.3</b>  | 56.1         |
| Shivhare                                 | 178 | 2015 | Bangalore, India                 |            | 90  | <b>63.1</b>  | <b>60.6</b>  | 61.9         |
| Narain                                   | 179 | 2016 | Davanagere, Karnataka, India     |            | 200 | <b>63.1</b>  | <b>60.6</b>  | <b>63.01</b> |
| Banu                                     | 180 | 2017 | Mangalore, Karnataka             |            | 120 | <b>65.2</b>  | <b>61.8</b>  | 63.5         |
| Barman                                   | 181 | 2018 | Meghalaya, Assam, India          |            | 120 | <b>70.86</b> | <b>70.0</b>  | 70.43        |
| Sasidharan                               | 182 | 2019 | Mangaluru, Karnataka             |            | 400 | <b>62.1</b>  | <b>61.3</b>  | <b>61.7</b>  |
| Sivaranjani                              | 183 | 2019 | Chennai, Tamil Nadu              |            | 100 | <b>62</b>    | <b>62</b>    | 62           |
| Yu                                       | 184 | 2019 | Indians residing in Singapore    |            | 70  | <b>62.7</b>  | <b>57.6</b>  | 60.2         |
| Flament                                  | 82  | 2020 | Chennai, Kolkata, Delhi, India   |            | 886 | 66.07        | <b>63.0</b>  | 64.34        |
| Nehaapriya                               | 185 | 2020 | Chennai, Tamil Nadu              |            | 150 | 60.03        | 56.97        | <b>58.5</b>  |
| Rupashri                                 | 186 | 2020 | Chennai, Tamil Nadu              |            | 250 | <b>62.7</b>  | <b>61.8</b>  | 62.3         |
| Deepasakthi                              | 187 | 2021 | Chennai, Tamil Nadu              |            | 102 | <b>66.91</b> | <b>63.39</b> | 65.15        |
| Sarathi                                  | 168 | 2021 | Tamil Nadu+, India               |            | 78  |              |              | 62.9         |
| Shetty                                   | 188 | 2021 | Mangalore, Karnataka, India      |            | 252 | <b>62.26</b> | <b>58.46</b> | 60.36        |
| Girimallanavar                           | 189 | 2022 | Bangalore, Karnataka, India      |            | 100 | <b>65.1</b>  | <b>60.9</b>  | 63.0         |
| Singh AD                                 | 190 | 2023 | Andhra Pradesh, India            |            | 100 | 64.41        | 61.35        | <b>62.88</b> |

|                  |     |      |                                                   |              |       |              |              |              |
|------------------|-----|------|---------------------------------------------------|--------------|-------|--------------|--------------|--------------|
| Bandhu           | 191 | 2023 | Jharkhand, India                                  |              | 500   | <b>63.3</b>  | <b>61</b>    | <b>62.18</b> |
| <b>EAST ASIA</b> |     |      |                                                   | M=F+2.55     |       |              |              |              |
| Fung             | 192 | 1964 | Beijing, China                                    |              | 1,113 | <b>61.29</b> | <b>59.85</b> | 60.57        |
| White            | 193 | 1964 | Thailand (South)                                  |              | 2,950 | <b>64.0</b>  | 61.5         | 62.75        |
| White            | 194 | 1964 | Vietnam                                           |              | 2,129 | <b>62.0</b>  | 59.5         | 60.75        |
| Pryor            | 36  | 1969 | Japanese (in USA)                                 |              | 149   | <b>66.0</b>  | <b>64.0</b>  | 65.0         |
| Nakagawa         | 195 | 1974 | Sapporo, Japan                                    |              | 281   | <b>63.5</b>  | <b>61.6</b>  | 62.6         |
| Park YK          | 196 | 1975 | Seoul (South), Korea                              |              | 570   | <b>65.31</b> | <b>60.78</b> | 63.05        |
| Sun              | 197 | 1979 | Tianjin, China                                    |              | 650   | <b>61.0</b>  | 58.5         | 59.75        |
| Wang JL          | 198 | 1981 | Guanxi Zhuang, China                              |              | 944   | <b>62.0</b>  | <b>60.3</b>  | 61.2         |
| Kim CJ           | 199 | 1988 | Korea (cited by Vasanthakumar, 2013)              |              | 323   | <b>59.9</b>  | <b>63.5</b>  | 61.7         |
| Park             | 38  | 1990 | Daegu, Korea                                      |              | 1,653 | <b>65.45</b> | <b>64.30</b> | 64.88        |
| Quant            | 200 | 1992 | Hong Kong, China                                  |              | 243   | <b>64.59</b> | <b>61.31</b> | 62.95        |
| Quant            | 201 | 1992 | Guangdong, China                                  |              | ~200  | <b>63.72</b> | <b>61.04</b> | 62.38        |
| Cho JH           | 202 | 1993 | Korea                                             |              | 1,500 | <b>69.4</b>  | <b>66.6</b>  | 68.0         |
| Hwang            | 203 | 1996 | Seoul, Korea                                      |              | 700   | <b>69.4</b>  | <b>66.6</b>  | <b>67.6</b>  |
| Tang             | 204 | 1998 | Hong Kong, China                                  |              | 500   | <b>64.3</b>  | <b>61.6</b>  | 62.95        |
| Song             | 205 | 1999 | Daegu, Korea                                      |              | 498   | <b>64.6</b>  | <b>63.6</b>  | 64.1         |
| Wang Y           | 40  | 2001 | Qingdao+, China                                   |              | 740   | <b>61.5</b>  | <b>59.37</b> | <b>60.39</b> |
| Ngeow            | 206 | 2006 | Sabah, Malaysia                                   | KadasanDusun | 140   | <b>64.6</b>  | <b>61.2</b>  | 62.9         |
| Al Junid         | 207 | 2007 | Kuala Lumpur, Malaysia                            | Malays       | 100   | <b>64.5</b>  | <b>62.3</b>  | <b>63.4</b>  |
| Al Junid         | 207 | 2007 | Kuala Lumpur, Malaysia                            | Chinese      | 100   | <b>64.8</b>  | <b>61.4</b>  | <b>63.1</b>  |
| Al Junid         | 207 | 2007 | Kuala Lumpur, Malaysia                            | Indians      | 100   | <b>64.1</b>  | <b>61.1</b>  | <b>62.6</b>  |
| Du               | 208 | 2008 | Hubei, Jianxi, Chongqing, Guangxi, Shanxi (China) |              | 3,000 | <b>64.2</b>  | <b>61.1</b>  | 62.6         |
| Lee              | 209 | 2008 | Daejeon, Korea                                    |              | 275   | <b>62.3</b>  | <b>59.9</b>  | 61.1         |
| Lee              | 209 | 2008 | Ueda, Nagano, Japan                               |              | 275   | <b>68.9</b>  | <b>63.9</b>  | 66.4         |
| Park DH          | 210 | 2008 | Daegu, Korea                                      |              | 498   | <b>64.6</b>  | <b>63.6</b>  | 64.1         |
| Isa              | 211 | 2010 | Kuala Lumpur, Malaysia                            | Malays       | 61    | 63.58        | 61.03        | <b>62.3</b>  |
| Preechawai       | 212 | 2011 | Thailand (South)                                  | Chinese      | 24    | <b>64.4</b>  | <b>59.7</b>  | 62.1         |
| Preechawai       | 212 | 2011 | Thailand (South)                                  | Thai         | 24    | <b>61.3</b>  | <b>59.5</b>  | 60.5         |
| Preechawai       | 212 | 2011 | Thailand (South)                                  | Thai-Malay   | 24    | <b>62.9</b>  | <b>60.7</b>  | 61.8         |
| Preechawai       | 212 | 2011 | Thailand (South)                                  | Thai-Chinese | 24    | <b>63.8</b>  | <b>60.0</b>  | 61.9         |
| Eom              | 213 | 2013 | Seoul, Korea                                      |              | 33    | 64.38        | 61.83        | <b>63.1</b>  |
| Takahashi        | 214 | 2014 | Aichi, Japan                                      |              | 143   | <b>64.7</b>  | <b>61.9</b>  | 63.3         |
| Mishra MK        | 215 | 2016 | Dharan, Nepal                                     | Mongoloid    | 85    | 58.78        | 56.23        | <b>57.5</b>  |
| Mishra MK        | 215 | 2016 | Dharan, Nepal                                     | Aryans       | 85    | 63.2         | 60.65        | <b>61.92</b> |
| Lin              | 216 | 2017 | Taiwan, China                                     |              | 206   | <b>61.6</b>  | <b>58.8</b>  | 60.2         |
| Lu               | 217 | 2017 | Kuala Lumpur, Malaysia                            | Malays       | 103   | <b>66.03</b> | <b>62.44</b> | <b>64.04</b> |
| Lu               | 217 | 2017 | Kuala Lumpur, Malaysia                            | Chinese      | 97    | <b>64.37</b> | <b>61.33</b> | <b>62.85</b> |
| Hwang H          | 218 | 2018 | Daejeon, Korea                                    |              | 21    | 65.48        | 62.93        | <b>64.2</b>  |
| Kim YC           | 219 | 2018 | Seoul, Korea                                      |              | 91    | 63.35        | <b>61.0</b>  | 62.2         |
| Rokaya           | 220 | 2018 | Kathmandu, Nepal                                  |              | 200   | <b>62.67</b> | <b>59.46</b> | 61.07        |
| Mishra S         | 221 | 2019 | Bharatpur, Nepal                                  |              | 113   | 62.0         | <b>59.5</b>  | 60.75        |
| Sano             | 222 | 2019 | Tochigi, Japan                                    |              | 213   | 64.38        | 61.83        | <b>63.1</b>  |
| Yu P             | 183 | 2019 | Residing in Singapore                             | Chinese      | 150   | <b>61.9</b>  | <b>59.2</b>  | 60.6         |
| Flament          | 82  | 2020 | China (multiple sites)                            |              | 574   | 67.55        | <b>65.0</b>  | 66.3         |
| Flament          | 82  | 2020 | Tokyo, Japan                                      |              | 915   | 68.55        | <b>66.0</b>  | 67.3         |
| Jung             | 223 | 2020 | Daegu, Korea                                      |              | 120   | 64.6         | <b>62.2</b>  | 63.4         |

|                             |     |      |                                |                      |       |              |              |              |
|-----------------------------|-----|------|--------------------------------|----------------------|-------|--------------|--------------|--------------|
| Aziz                        | 224 | 2021 | Selangor, Malaysia             |                      | 170   | <b>68.3</b>  | <b>65.9</b>  | 67.2         |
| Kim JS                      | 18  | 2021 | Seoul, Korea                   |                      | 22    | <b>66.8</b>  | <b>60.5</b>  | 63.65        |
| Husna                       | 225 | 2022 | Java (West)                    |                      | 39    | 65.1         | <b>62.6</b>  | 63.85        |
| Lim                         | 226 | 2022 | Malaysia (multiple sites)      |                      | 2,127 | 65.0         | 62.4         | <b>63.70</b> |
| Tuladhar                    | 227 | 2023 | Pokhara, Nepal                 |                      | 199   | <b>67.13</b> | <b>65.15</b> | <b>66.09</b> |
| Xu Y                        | 228 | 2023 | Shanghai, China                |                      | 103   | 63.95        | 61.6         | <b>62.75</b> |
| Hor                         | 229 | 2023 | Cambodia                       |                      | 50    | 64.36        | 61.81        | <b>63.08</b> |
| Alberto                     | 230 | 2024 | Cabanatuan City, Philippines   |                      | 300   | <b>62.59</b> | <b>60.29</b> | 61.44        |
| Laher                       | 231 | 2024 | Dang Valley, Nepal             | Aryans               | 406   | <b>62.25</b> | <b>60.48</b> | 61.37        |
| Laher                       | 231 | 2024 | Dang Valley, Nepal             | Mongoloids           | 406   | <b>62.71</b> | <b>61.91</b> | 62.31        |
| Wang J                      | 232 | 2024 | Taiyuan, Shanxi, China         |                      | 409   | <b>65.43</b> | <b>61.64</b> | <b>63.49</b> |
|                             |     |      |                                |                      |       |              |              |              |
| <b>OCEANIA</b>              |     |      |                                |                      |       |              |              |              |
|                             |     |      |                                |                      |       |              |              |              |
| <b>INDIGENOUS</b>           |     |      |                                |                      |       |              |              |              |
| Bridgman                    | 233 | 1999 | New Zealand, Maori             |                      | 191   | <b>63.3</b>  | <b>60.1</b>  | 61.2         |
| Bridgman                    | 233 | 1999 | New Zealand, Samoan            |                      | 148   | <b>64.5</b>  | <b>61.7</b>  | 63.1         |
|                             |     |      |                                |                      |       |              |              |              |
| <b>MULTIPLE ETHNICITIES</b> |     |      |                                |                      |       |              |              |              |
| Swan                        | 234 | 2005 | Adelaide, Australia            | Caucasian            | 54    | <b>63.6</b>  | <b>59.6</b>  | 61.6         |
| Ellakwa                     | 235 | 2011 | Sydney, Australia              | Multiple Ethnicities | 120   | <b>62.01</b> | <b>58.91</b> | <b>60.68</b> |
| Kolose                      | 236 | 2021 | New Zealand, Mixed Populations | Defense Force        | 1,002 | <b>61</b>    | <b>58</b>    | 59.5         |
| Rana                        | 237 | 2023 | Adelaide, Australia            | Caucasian            | 316   | 62.7         | 59.7         | <b>61.2</b>  |
| Rana                        | 237 | 2023 | Adelaide, Australia            | East Asian           | 28    | 63.2         | 60.2         | <b>61.7</b>  |
| Rana                        | 237 | 2023 | Adelaide, Australia            | South Asian          | 27    | 63.9         | 59.9         | <b>61.4</b>  |
| Rana                        | 237 | 2023 | Adelaide, Australia            | African              | 9     | 66.8         | 63.8         | <b>65.3</b>  |
| McAnally                    | 238 | 2024 | Brisbane, Australia            |                      | 30    | 65.2         | 62.2         | <b>63.7</b>  |
|                             |     |      |                                |                      |       |              |              |              |
| <b>DOWN SYNDROME</b>        |     |      |                                |                      |       |              |              |              |
| Fanning                     | 239 | 1971 | Brisbane, Australia            |                      | 24    |              |              | <b>53.0</b>  |
|                             |     |      |                                |                      |       |              |              |              |
| <b>AMERICA</b>              |     |      |                                |                      |       |              |              |              |
|                             |     |      |                                |                      |       |              |              |              |
| <b>CAUCASIAN</b>            |     |      |                                |                      |       |              |              |              |
|                             |     |      |                                | M=F+2.64             |       |              |              |              |
|                             |     |      |                                |                      |       |              |              |              |
| Jackson                     | 35  | 1921 | Colorado, USA                  |                      | 4,560 | <b>63.7</b>  | <b>61.5</b>  | 62.6         |
| Davenport                   | 240 | 1929 | Jamaica                        |                      | 100   | <b>65.12</b> | <b>62.60</b> | 63.86        |
| Lucas                       | 241 | 1935 | San Francisco, CA, USA         |                      | 370   | <b>59</b>    | <b>59</b>    | <b>59</b>    |
| Hertzberg                   | 242 | 1954 | Ohio, USA                      |                      | 4,057 | <b>63.27</b> | 60.6         | 61.95        |
| Ditmars                     | 29  | 1966 | San Francisco, CA, USA         |                      | 500   | <b>65.44</b> | <b>62.62</b> | <b>64.18</b> |
| Pryor                       | 36  | 1969 | San Francisco, CA, USA         |                      | 391   | <b>62.0</b>  | 59.35        | 60.65        |
| White                       | 243 | 1971 | US Army, USA                   |                      | 6,680 | <b>61.3</b>  | 58.65        | 60.0         |
| Backman                     | 244 | 1972 | Quebec, Canada                 |                      | 5     | 66.32        | 63.68        | <b>65.0</b>  |
| Hofstetter                  | 245 | 1972 | Indiana, USA                   |                      | 331   | <b>66.5</b>  | 64.0         | 65.3         |
| Hofstetter                  | 245 | 1972 | Indiana, USA                   |                      | 134   | <b>65.7</b>  | 63.2         | 64.5         |
| Hofstetter                  | 245 | 1972 | Indiana, USA                   |                      | 113   | <b>64.4</b>  | 61.9         | 63.2         |
| White                       | 246 | 1977 | US Marine Corps, USA           |                      | 2,008 | <b>60.8</b>  | 58.1         | 59.45        |
| Jaeger                      | 247 | 1980 | Philadelphia, PA, USA          |                      | 88    | <b>61.4</b>  | <b>60.0</b>  | 60.7         |
| Cesario                     | 5   | 1984 | Washington DC, USA             |                      | 50    | <b>57.87</b> | <b>56.61</b> | 57.2         |

|                      |     |      |                           |                  |          |              |              |              |
|----------------------|-----|------|---------------------------|------------------|----------|--------------|--------------|--------------|
| Bogren               | 248 | 1986 | Sacramento, CA, USA       |                  | 7        | 61.66        | <b>59</b>    | <b>60.3</b>  |
| Latta                | 6   | 1991 | Tennessee, USA            |                  | 54       | <b>63</b>    | <b>60</b>    | 61.5         |
| Young                | 249 | 1993 | USA                       |                  | 238      | <b>61.39</b> | <b>58.44</b> | 59.92        |
| Farkas               | 250 | 1994 | Toronto, Canada           |                  | 309      | <b>67.0</b>  | <b>62.6</b>  | 64.8         |
| Nanda                | 251 | 1995 | Oklahoma, USA             |                  | 50       | <b>65.11</b> | <b>61.45</b> | 63.28        |
| Hall                 | 252 | 1996 | Forest Grove, OR, USA     |                  | 201      | <b>62.7</b>  | 60.0         | 61.35        |
| Cole                 | 253 | 1997 | Tulane, LA, USA           |                  | 104      | <b>61.57</b> | <b>60.15</b> | 60.86        |
| Barretto             | 254 | 1999 | Michigan, USA             |                  | 65       | <b>65.15</b> | <b>61.47</b> | 63.3         |
| Pivnick              | 255 | 1999 | Tennessee, USA            |                  | 391      | <b>62</b>    | <b>60</b>    | 61           |
| MacLachlan           | 41  | 2002 | Ithaca, NY, USA           |                  | 13       | <b>62.21</b> | <b>59.99</b> | 61.11        |
| Bradtmiller          | 256 | 2004 | USA                       |                  | 1,886    | <b>64.00</b> | <b>61.17</b> | 62.6         |
| Dodgson              | 4   | 2004 | USA                       |                  | 2,302    | 63.35        | 60.65        | <b>61.99</b> |
| Keefe                | 257 | 2012 | Canada (Forces)           |                  | 2,191    | <b>63</b>    | <b>59</b>    | 61           |
| Gordon               | 258 | 2016 | US Pilots, 977 m, 42 f    | 88%<br>Caucasian | 1,372    | <b>63.4</b>  | <b>60.3</b>  | 61.85        |
| Parciak              | 7   | 2017 | Riverside, CA, USA        |                  | 120      | <b>77.4</b>  | <b>74.8</b>  | 76.1         |
| DOWN SYNDROME        |     |      |                           |                  |          |              |              |              |
|                      |     |      |                           | M=F-0.1          |          |              |              |              |
| Lyle                 | 259 | 1972 | Waterloo, Ontario, Canada |                  | 22       | <b>54.3</b>  | <b>55.6</b>  | 55.0         |
| Jaeger               | 247 | 1980 | Philadelphia, PA, USA     |                  | 50       | <b>58.6</b>  | <b>57.4</b>  | 58.0         |
| Krinsky-McHale       | 260 | 2014 | New York City, NY, USA    |                  | 5        | 56.35        | 56.45        | <b>56.4</b>  |
| AFRICAN AMERICAN     |     |      |                           |                  | M=F+3.32 |              |              |              |
| Herskovits           | 261 | 1926 | New York City, USA        |                  | 529      | <b>68.1</b>  | 64.85        | 66.5         |
| Davenport            | 240 | 1929 | Jamaica                   |                  | 100      | <b>70.60</b> | <b>66.68</b> | 68.64        |
| Cesario              | 5   | 1984 | Washington DC, USA        |                  | 50       | <b>62.86</b> | <b>59.39</b> | 61.1         |
| Murphy               | 262 | 1990 | Virginia, USA             |                  | 100      | <b>66.3</b>  | <b>62.6</b>  | 64.5         |
| Latta                | 6   | 1991 | Tennessee, USA            |                  | 55       | <b>66</b>    | <b>63</b>    | 64.5         |
| Cole                 | 253 | 1997 | Tulane, Louisiana         |                  | 236      | <b>64.63</b> | <b>63.2</b>  | 63.92        |
| Barretto             | 254 | 1999 | Michigan, USA             |                  | 61       | <b>68.97</b> | <b>65.93</b> | 67.5         |
| Pivnick              | 255 | 1999 | Tennessee, USA            |                  | 52       | <b>70</b>    | <b>66</b>    | 68           |
| Bradtmiller          | 256 | 2004 | USA                       |                  | 1,223    | <b>67.70</b> | <b>65.51</b> | 66.6         |
| Dodgson              | 4   | 2004 | USA                       |                  | 1,376    | 67.2         | 64.0         | <b>65.62</b> |
| Parciak              | 7   | 2017 | Riverside, CA, USA        |                  | 120      | <b>82.7</b>  | <b>77.6</b>  | 80.15        |
| NATIVE AMERICAN      |     |      |                           |                  |          |              |              |              |
| Dodgson              | 4   | 2004 | USA                       |                  | 26       | 66.1         | 64.1         | <b>65.12</b> |
| MULTIPLE ETHNICITIES |     |      |                           |                  |          |              |              |              |
|                      |     |      |                           | M=F+3.07         |          |              |              |              |
| Gordon               | 263 | 2014 | US Army                   |                  | 6,068    | <b>64.0</b>  | <b>61.7</b>  | 62.85        |
| Murray               | 264 | 2017 | North Carolina, USA       |                  | 416      | <b>65.32</b> | <b>61.53</b> | 63.4         |
| LATINO / HISPANIC    |     |      |                           |                  | M=F+2.01 |              |              |              |
| Pryor                | 36  | 1969 | Oaxaca, Mexico            |                  | 106      | <b>65.0</b>  | <b>64.0</b>  | 64.5         |
| Kawagoe              | 265 | 1998 | Sao Paulo, Brazil         |                  | 30       | 62.3         | 60.3         | <b>61.3</b>  |
| Bradtmiller          | 256 | 2004 | USA                       |                  | 538      | <b>64.66</b> | <b>62.17</b> | 63.42        |
| Dodgson              | 4   | 2004 | USA                       |                  | 125      | 64.5         | 62.5         | <b>63.54</b> |
| Gomes                | 266 | 2006 | Uberlandio, Brazil        |                  | 81       | 70.1         | 68.1         | <b>69.1</b>  |

|          |     |      |                      |  |       |              |              |              |
|----------|-----|------|----------------------|--|-------|--------------|--------------|--------------|
| Roehe    | 267 | 2008 | Recife, Brazil       |  | 135   | 65.2         | 63.2         | <b>64.2</b>  |
| Arenas   | 268 | 2014 | Bogota, Colombia     |  | 1,262 | 63.58        | 61.58        | <b>62.58</b> |
| Da Cunha | 269 | 2015 | Santa Rosa, Brazil   |  | 160   | <b>65.02</b> | <b>62.47</b> | 63.75        |
| Flament  | 82  | 2020 | NJ, USA; Mexico City |  | 329   | 66.5         | <b>64.5</b>  | 65.5         |
|          |     |      |                      |  |       |              |              |              |

The mean difference between males (M) and females (F) for each ethnicity with data is indicated as:  $M=F+x$  (mm). Reported values for the IPD are shown in bold font and estimated/calculated values (for male, female or the mean) are shown in regular font. Ref, reference showing the number in the List of References.

**Supplemental Table S2. Esotropia/exotropia (ET/XT) ratio in different populations/regions.**

| First Author      | Ref # | Year | Ethnicity/Region      | Comments | Cohort size | ET % | XT % | ET/XT Ratio |
|-------------------|-------|------|-----------------------|----------|-------------|------|------|-------------|
| <b>EUROPE</b>     |       |      |                       |          |             |      |      |             |
| Schenk            | S1    | 1969 | Vienna, Austria       |          | 67          | 8.96 | 1.49 | 6.00        |
| Aichmair          | S2    | 1992 | Vienna, Austria       |          | 843         | 2.97 | 0.95 | 3.13        |
| Vereecken         | S3    | 1966 | Belgium               |          | 1,215       | 3.29 | 0.41 | 8.00        |
| Popovic-Beganovic | S4    | 2018 | Bosnia                |          | 997         | 1.50 | 1.40 | 1.07        |
| Medkova           | S5    | 1959 | Opava, Czechoslovakia |          | 148         | 4.05 | 0.68 | 6.00        |
| Karlica           | S6    | 2008 | Croatia               |          | 20,045      | 2.14 | 1.84 | 1.16        |
| Frandsen          | S7    | 1960 | Denmark               |          | 13,107      | 3.47 | 0.92 | 3.77        |
| Frandsen          | S7    | 1960 | Denmark               |          | 2,570       | 5.29 | 0.74 | 7.16        |
| Frandsen          | S7    | 1960 | Denmark               |          | 10,537      | 3.36 | 1.05 | 3.19        |
| Sandfeld          | S8    | 2018 | Roskilde, Denmark     |          | 445         | 1.35 | 0.22 | 6.00        |
| Hultman           | S9    | 2019 | Denmark               |          | 3,785       | 0.77 | 0.32 | 2.42        |
| Rantanen          | S10   | 1971 | Helsinki, Finland     |          | 2,100       | 2.62 | 2.14 | 1.22        |
| Laatikainen       | S11   | 1980 | Helsinki, Finland     |          | 411         | 2.92 | 1.70 | 1.71        |
| Kaakinen          | S12   | 1981 | Helsinki, Finland     |          | 182         | 1.10 | 0    | 5*          |
| Kaakinen          | S13   | 1986 | Helsinki, Finland     |          | 169         | 2.96 | 0.59 | 5.00        |
| Tuppurainen       | S14   | 1993 | Kuopio, Finland       |          | 56          | 0    | 1.79 | 0.33*       |
| Speeg-Schatz      | S15   | 2004 | Alsace, France        |          | 2,318       | 2.89 | 0.22 | 13.4        |
| Cohn              | S16   | 1867 | Breslau, Germany      |          | 10,060      | 2.21 | 0.04 | 55.5        |
| Schleich          | S17   | 1905 | Tübingen, Germany     |          | 2,098       | 1.38 | 0.10 | 15.5        |
| Schleich          | S17   | 1905 | Tübingen, Germany     |          | 566         | 1.06 | 1.77 | 0.60        |
| Schildwächter     | S18   | 1972 | Hessia, Germany       |          | 2,660       | 4.10 | 0    | 219*        |
| De Decker         | S19   | 1973 | Kiel, Germany         |          | 1,525       | 4.39 | 0.85 | 5.15        |
| Schütte           | S20   | 1976 | Aachen, Germany       |          | 4,229       | 3.43 | 0.83 | 4.14        |
| Toppel            | S21   | 1978 | Munich, Germany       |          | 1,212       | 3.47 | 0.08 | 42.0        |
| Haase             | S22   | 1979 | Hamburg, Germany      |          | 830         | 5.18 | 1.08 | 4.78        |
| Rüssmann          | S23   | 1990 | Cologne, Germany      |          | 254         | 1.18 | 0.79 | 1.5         |
| Kasmann-Keller    | S24   | 1998 | Saar, Germany         |          | 939         | 1.70 | 0.64 | 2.67        |
| Fiess             | S25   | 2017 | Wiesbaden, Germany    |          | 264         | 1.14 | 0.38 | 3.00        |
| Fiess             | S26   | 2020 | Mainz, Germany        |          | 14,700      | 1.60 | 0.80 | 2.00        |
| Donnelly          | S27   | 2005 | Ulster, N. Ireland    |          | 1,582       | 3.35 | 0.63 | 5.30        |
| Montvilaite       | S28   | 2015 | Lithuania             |          | 40          | 2.50 | 0    | 3*          |
| Paduca            | S29   | 2020 | Moldova               |          | 861,682     | 1.00 | 0.29 | 3.41        |
| Holst             | S30   | 1962 | Oslo, Norway          |          | 21,484      | 2.16 | 0.1  | 21.6        |
| Holst             | S30   | 1962 | Oslo, Norway          |          | 31,330      | 1.95 | 0.1  | 19.5        |
| Aslaksen          | S31   | 2023 | Sorlandet, Norway     |          | 63          | 0    | 4.76 | 0.14*       |
| Dalz              | S32   | 2009 | Poznan, Poland        |          | 3,025       | 1.39 | 0.40 | 3.50        |
| Quental           | S33   | 2013 | Portugal (South)      |          | 885         | 0.79 | 0.68 | 1.17        |
| Lanca             | S34   | 2014 | Lisbon, Portugal      |          | 672         | 2.08 | 1.79 | 1.16        |
| Hendrickson       | S35   | 2001 | Sibiu, Romania        |          | 676         | 6.07 | 2.96 | 2.05        |
| Hendrickson       | S35   | 2001 | Sibiu, Romania        |          | 184         | 3.26 | 2.17 | 1.50        |
| Mazepa            | S36   | 1967 | Saratov, Russia       |          | 1,507       | 1.99 | 0    | 61*         |
| Maimulov          | S37   | 1971 | Leningrad, Russia     |          | 2,034       | 1.67 | 1.38 | 1.21        |

|                                           |     |      |                        |          |        |      |      |       |
|-------------------------------------------|-----|------|------------------------|----------|--------|------|------|-------|
| Delgado-Molina                            | S38 | 1991 | Madrid, Spain          |          | 1,852  | 0.86 | 0.22 | 4.00  |
| Martinez                                  | S39 | 1997 | Valladolid, Spain      |          | 1,179  | 2.88 | 1.10 | 2.62  |
| Nordlöv                                   | S40 | 1944 | Gotaland, Sweden       |          | 2,271  | 3.17 | 0.40 | 8.00  |
| Nordlöv                                   | S41 | 1964 | Gotaland, Sweden       |          | 6,004  | 3.55 | 0.43 | 8.19  |
| Köhler                                    | S42 | 1973 | Lund, Sweden           |          | 2,397  | 2.89 | 0.92 | 3.17  |
| Lennerstrand                              | S43 | 1991 | Stockholm, Sweden      |          | 1,047  | 0.76 | 0.57 | 1.33  |
| Rasmussen                                 | S44 | 2000 | Uppsala, Sweden        |          | 3,493  | 2.38 | 1.12 | 2.13  |
| Kvarnström                                | S45 | 2001 | Lund/Linköping, Sweden |          | 3,126  | 1.50 | 0.58 | 2.59  |
| Ohlsson                                   | S46 | 2001 | Göteborg, Sweden       |          | 1,046  | 0.86 | 0.67 | 1.29  |
| Aring                                     | S47 | 2005 | Göteborg, Sweden       |          | 143    | 2.80 | 0.70 | 4.00  |
| Holmström                                 | S48 | 2006 | Stockholm, Sweden      |          | 217    | 0.92 | 2.30 | 0.40  |
| Abdi                                      | S49 | 2008 | Stockholm, Sweden      |          | 216    | 0.93 | 0.46 | 2.00  |
| Voirol                                    | S50 | 1912 | Basel, Switzerland     |          | 939    | 0.64 | 0.21 | 3.04  |
| Franceschetti                             | S51 | 1966 | Geneva, Switzerland    |          | 314    | 1.59 | 1.27 | 1.25  |
| Gansner                                   | S52 | 1968 | Zürich Switzerland     |          | 9,384  | 1.25 | 0.30 | 4.19  |
| Worth                                     | S53 | 1906 | London, UK             |          | 10,239 | 2.26 | 0.21 | 10.50 |
| Tyser                                     | S54 | 1949 | London, UK             |          | 460    | 2.39 | 0    | 23*   |
| Sorsby                                    | S55 | 1960 | UK                     | recruits | 1,033  | 3.29 | 0.68 | 4.86  |
| Graham                                    | S56 | 1974 | Cardiff, UK            |          | 4,784  | 3.62 | 0.77 | 4.70  |
| Bruce                                     | S57 | 1991 | Bradford, UK           |          | 339    | 2.95 | 1.18 | 2.50  |
| Stayte                                    | S58 | 1993 | Berkshire, UK          |          | 6,483  | 1.88 | 0.40 | 4.70  |
| Newman                                    | S59 | 1996 | Cambridge, UK          |          | 6,794  | 0.21 | 0.29 | 0.70  |
| O'Connor                                  | S60 | 2002 | East Midlands, UK      |          | 169    | 1.78 | 0.59 | 3.00  |
| Williams                                  | S61 | 2008 | Avon, UK               |          | 7,538  | 1.70 | 0.49 | 3.46  |
| Hu                                        | S62 | 2012 | Walsall, UK            |          | 2,830  | 0.74 | 0.14 | 5.25  |
| Toufeeq                                   | S63 | 2014 | Chesterfield, UK       |          | 3,726  | 2.41 | 1.31 | 1.84  |
| Bruce                                     | S64 | 2016 | Bradford, UK           |          | 1,558  | 1.22 | 0.90 | 1.36  |
| Plotnikov                                 | S65 | 2019 | Avon, UK               |          | 5,172  | 2.83 | 0.54 | 5.11  |
|                                           |     |      |                        |          |        |      |      |       |
| <b>DOWN SYNDROME (EUROPE)</b>             |     |      |                        |          |        |      |      |       |
| Skeller                                   | S66 | 1951 | Copenhagen, Denmark    |          | 77     | 31.2 | 3.9  | 8.0   |
| Oster                                     | S67 | 1953 | Seeland, Denmark       |          | 526    | 22.2 | 0.4  | 58.5  |
| Haargaard                                 | S68 | 2006 | Denmark (national)     |          | 29     | 51.7 | 6.9  | 7.5   |
| Pearce                                    | S69 | 1910 | London, UK             |          | 28     | 25   | 0    | 15*   |
| Ormond                                    | S70 | 1912 | London, UK             |          | 42     | 21.4 | 0    | 19*   |
| Brushfield                                | S71 | 1924 | London, UK             |          | 177    | 100  | 0    | 355*  |
| Engler                                    | S72 | 1949 | London, UK             |          | 145    | 49   | 1.4  | 35    |
| Lowe                                      | S73 | 1949 | London, UK             |          | 67     | 32.8 | 0    | 45*   |
| Oladiwura                                 | S74 | 2022 | London, UK             |          | 48     | 37.5 | 12.5 | 3.0   |
| Woodhouse                                 | S75 | 1997 | Cardiff, Wales, UK     |          | 92     | 34   | 1    | 34    |
| Bromham                                   | S76 | 2002 | Wales, UK              |          | 58     | 43.1 | 3.4  | 12.68 |
| Cregg                                     | S77 | 2003 | Wales, UK              |          | 55     | 29.1 | 0    | 33*   |
| Stewart                                   | S78 | 2007 | Wales, UK              |          | 53     | 20.8 | 1.9  | 10.95 |
| Vontobel                                  | S79 | 1933 | Zurich, Switzerland    |          | 25     | 60   | 0    | 31*   |
| Gnad                                      | S80 | 1979 | Vienna, Austria        |          | 420    | 28   | 3    | 9.33  |
| Missiroli                                 | S81 | 1970 | Rome, Italy            |          | 25     | 28   | 0    | 15*   |
| Fimiani                                   | S82 | 2007 | Naples, Italy          |          | 157    | 28.7 | 7    | 4.1   |
| Purpura                                   | S83 | 2019 | Pisa/Florence, Italy   |          | 42     | 19   | 0    | 17*   |
|                                           |     |      |                        |          |        |      |      |       |
| <b>AFRICA (NORTHEAST, CENTRAL, SOUTH)</b> |     |      |                        |          |        |      |      |       |
|                                           |     |      |                        |          |        |      |      |       |

|                      |      |      |                          |              |       |      |       |       |
|----------------------|------|------|--------------------------|--------------|-------|------|-------|-------|
| Elsahn               | S84  | 2014 | Alexandria, Egypt        |              | 6,029 | 0.12 | 0.02  | 7.0   |
| Abdelrahman          | S85  | 2020 | Sohag City, Egypt        |              | 584   | 0.51 | 0     | 7*    |
| Giorgis              | S86  | 2001 | Addis Abeba, Ethiopia    |              | 1,894 | 1.06 | 0.37  | 2.86  |
| Tegegne              | S87  | 2021 | Bahir Dar City, Ethiopia |              | 611   | 4.09 | 0.98  | 4.17  |
| Onsomu               | S88  | 2003 | Nairobi, Kenya           |              | 559   | 0.18 | 2.68  | 0.07  |
| Mutie                | S89  | 2008 | Nairobi (East), Kenya    |              | 602   | 0.33 | 0     | 5*    |
| Gordon               | S90  | 1982 | Maseru, Lesotho          |              | 1,296 | 0.54 | 0.15  | 3.50  |
| Auzemery             | S91  | 1995 | Madagascar               |              | 1,081 | 0.69 | 0.42  | 1.64  |
| Freedman             | S92  | 1973 | Namibia                  |              | 680   | 0.15 | 0.15  | 1.00  |
| Yassur               | S93  | 1972 | Rwanda                   |              | 1,550 | 0.32 | 0.52  | 0.62  |
| Naidoo               | S94  | 2003 | Durban, South Africa     |              | 4,890 | 0.88 | 0.33  | 2.69  |
| Zeidan               | S95  | 2007 | Khartoum City, Sudan     |              | 916   | 0    | 0.33  | 0.2*  |
| Taha                 | S96  | 2015 | Khartoum City, Sudan     |              | 768   | 2.21 | 0.39  | 5.67  |
| Alrasheed            | S97  | 2016 | South Darfur, Sudan      |              | 1,666 | 0.18 | 0.12  | 1.50  |
| Kingo                | S98  | 2009 | Dar es Salaam, Tanzania  |              | 400   | 0    | 0     | 1*    |
|                      |      |      |                          |              |       |      |       |       |
| <b>AFRICA (WEST)</b> |      |      |                          |              |       |      |       |       |
|                      |      |      |                          |              |       |      |       |       |
| Pergens              | S99  | 1898 | Congo                    |              | 100   | 0    | 0     | 1*    |
| Holm                 | S100 | 1939 | Gabon                    |              | 1,931 | 0.10 | 0.52  | 0.20  |
| Kumah                | S101 | 2013 | Ashanti, Ghana           |              | 2,435 | 0    | 1.77  | 0.01* |
| Nartey               | S102 | 2016 | Accra, Ghana             |              | 811   | 0    | 0     | 1*    |
| Abdul-Kabir          | S103 | 2017 | Kumasi, Ghana            |              | 67    | 0    | 1.49  | 0.33* |
| Hertz                | S104 | 1964 | Liberia                  |              | 1,020 | 0    | 1.37  | 0.34* |
| Abiose               | S105 | 1980 | Kaduna, Nigeria          | Hausa-Fulani | 5,220 | 0.3  | 0.44  | 0.52  |
| Baiyerou-Agbeja      | S106 | 1998 | Ibadan, Nigeria          | Yoruba       | 759   | 0.26 | 0     | 5*    |
| Abah                 | S107 | 2001 | Zaria, Nigeria           | Hausa-Fulani | 327   | 0.31 | 0     | 3*    |
| Ajaiyeoba            | S108 | 2005 | Ilesa, Nigeria           | Yoruba       | 1,144 | 0.09 | 0.17  | 0.50  |
| Atamah               | S109 | 2005 | Benin City, Nigeria      | Edo          | 600   | 0.33 | 0.83  | 0.40  |
| Azonobi              | S110 | 2009 | Ilorin, Nigeria          | Yoruba       | 7,288 | 0.30 | 0.14  | 2.20  |
| Ayanniyi             | S111 | 2010 | Ilorin, Nigeria          | Yoruba       | 1,393 | 0.14 | 0.22  | 0.66  |
| Akpe                 | S112 | 2014 | Benin City, Nigeria      | Edo          | 2,139 | 0.56 | 0.33  | 1.70  |
| Ezinne               | S113 | 2018 | Anambra, Nigeria         | Igbo         | 998   | 0.70 | 2.10  | 0.33  |
| Atuanya              | S114 | 2024 | Benin City, Nigeria      |              | 300   | 2.0  | 1.7   | 1.18  |
|                      |      |      |                          |              |       |      |       |       |
| <b>DOWN SYNDROME</b> |      |      |                          |              |       |      |       |       |
| Adio                 | S115 | 2012 | Port Harcourt, Nigeria   |              | 42    | 7.1  | 2.4   | 2.96  |
|                      |      |      |                          |              |       |      |       |       |
| <b>MIDDLE EAST</b>   |      |      |                          |              |       |      |       |       |
|                      |      |      |                          |              |       |      |       |       |
| Abdiyeha             | S116 | 2021 | Azerbaijan               |              | 2,700 | 0.56 | 2.41  | 0.23  |
| Fotouhi              | S117 | 2007 | Dezful, Iran             |              | 5,544 | 0.51 | 0.22  | 2.33  |
| Jamali               | S118 | 2009 | Shahrood, Iran           |              | 815   | 0.61 | 0.49  | 1.24  |
| Yekta                | S119 | 2010 | Shiraz, Iran             |              | 2,683 | 0.56 | 1.16  | 0.48  |
| Faghihi              | S120 | 2011 | Mashhad, Iran            |              | 2,150 | 0.88 | 2.09  | 0.42  |
| Kwak                 | S121 | 2011 | Alborz Mountains,        |              | 243   | 1.65 | 11.93 | 0.14  |

|                                          |      |      |                            |             |        |      |      |       |
|------------------------------------------|------|------|----------------------------|-------------|--------|------|------|-------|
|                                          |      |      | Iran                       |             |        |      |      |       |
| Faghihi                                  | S122 | 2012 | Varamin, Iran              |             | 1,133  | 0.44 | 0.88 | 0.50  |
| Yekta                                    | S123 | 2012 | Bojnourd, Iran             |             | 1,551  | 0.52 | 1.35 | 0.39  |
| Hashemi                                  | S124 | 2015 | Iran (multiple sites)      |             | 3,675  | 0.44 | 1.27 | 0.34  |
| Rajavi                                   | S125 | 2015 | Tehran, Iran               |             | 2,410  | 1.00 | 1.29 | 0.77  |
| Yekta                                    | S126 | 2016 | Dezful, Iran               |             | 1,130  | 0.71 | 1.24 | 0.57  |
| Hashemi                                  | S127 | 2017 | Tehran (North), Iran       |             | 1,414  | 0.30 | 4.44 | 0.68  |
| Hashemi                                  | S127 | 2017 | Dezful, Iran               |             | 1,834  | 0.53 | 3.44 | 0.15  |
| Hamidi                                   | S128 | 2019 | Bojnurd, Iran              |             | 6,600  | 0.36 | 0.24 | 2.0   |
| Hashemi                                  | S129 | 2020 | Shahrekord (Isfahan), Iran |             | 726    | 0.28 | 1.24 | 0.18  |
| Derakhshan                               | S130 | 2024 | Mashhad, Iran              |             | 5,054  | 0.51 | 1.46 | 0.35  |
| Halboos                                  | S131 | 2023 | Babylon, Iraq              |             | 1,016  | 3.1  | 2.1  | 1.48  |
| Mukhaiser                                | S132 | 2023 | Baghdad, City, Iraq        |             | 8,850  | 0.37 | 0.16 | 2.36  |
| Neumann                                  | S133 | 1971 | Haifa, Israel              |             | 6,400  | 1.41 | 0.61 | 2.31  |
| Friedman                                 | S134 | 1980 | Haifa, Israel              |             | 38,000 | 0.95 | 0.30 | 3.17  |
| Friedmann                                | S135 | 1980 | Negev, Israel              |             | 3,375  | 0.71 | 3.08 | 0.23  |
| Maaita                                   | S136 | 2003 | Jordan                     |             | 1,725  | 0.41 | 0.12 | 3.50  |
| Lithander                                | S137 | 1998 | Oman                       |             | 6,292  | 0.41 | 0.24 | 1.71  |
| Labadi                                   | S138 | 2022 | Nablus, Palestine          |             | 727    | 0.69 | 0.14 | 5.0   |
| Badr                                     | S139 | 1981 | Al Majma'ah, Saudi Arabia  |             | 833    | 1.08 | 0.72 | 1.50  |
| Abolfotouh                               | S140 | 1994 | Abha, Saudi Arabia         |             | 971    | 1.96 | 1.03 | 1.90  |
| Bardisi                                  | S141 | 2002 | Jeddah, Saudi Arabia       |             | 609    | 0.53 | 0.18 | 2.94  |
| Gorham                                   | S142 | 2021 | Syria                      | refugees    | 91     | 9.9  | 3.3  | 3.00  |
| Turacli                                  | S143 | 1995 | Ankara, Turkey             |             | 23,810 | 1.37 | 0.91 | 1.51  |
| Aslan                                    | S144 | 2013 | Kahramanmaras, Turkey      |             | 116    | 1.72 | 0.86 | 2.00  |
| Caca                                     | S145 | 2013 | Diyarbakir, Turkey         |             | 21,062 | 1.20 | 0.89 | 1.35  |
| Gursoy                                   | S146 | 2013 | Eskisehir, Turkey          |             | 709    | 1.41 | 0.71 | 2.00  |
| Celikay                                  | S147 | 2016 | Ankara, Turkey             |             | 686    | 0.44 | 0.29 | 1.50  |
|                                          |      |      |                            |             |        |      |      |       |
| <b>SOUTH ASIA (NORTHWEST)</b>            |      |      |                            |             |        |      |      |       |
|                                          |      |      |                            |             |        |      |      |       |
| McLaren                                  | S148 | 1961 | Gujarat, India             | migrants    | 359    | 1.11 | 0    | 9*    |
| Agarwal                                  | S149 | 1966 | Delhi, India               |             | 4,201  | 0.52 | 0.60 | 0.88  |
| Gupta                                    | S150 | 2000 | Aligarh, India             |             | 310    | 1.94 | 0.97 | 2.0   |
| Murthy                                   | S151 | 2002 | New Delhi, India           |             | 6,447  | 0.29 | 0.22 | 1.36  |
| Bedi                                     | S152 | 2016 | Rajasthan, India           |             | 2,754  | 0.11 | 0.15 | 0.75  |
| Mohan                                    | S153 | 2017 | Rajasthan, India           |             | 16,168 | 0.95 | 0.83 | 1.14  |
| Awan                                     | S154 | 1995 | Pakistan (North)           |             | 1,306  | 0.61 | 1.84 | 0.33  |
| Shaikh                                   | S155 | 2005 | Karachi, Pakistan          |             | 5,110  | 0.49 | 0.08 | 6.25  |
| Awan                                     | S156 | 1998 | Afghan refugees            | in Pakistan | 1,156  | 0.52 | 0.87 | 0.60  |
| Gupta                                    | S157 | 2021 | Surat, India               |             | 1,747  | 0.63 | 1.43 | 0.44  |
|                                          |      |      |                            |             |        |      |      |       |
| <b>DOWN SYNDROME</b>                     |      |      |                            |             |        |      |      |       |
| Qayyum                                   | S158 | 2006 | Lahore, Pakistan           |             | 37     | 21.6 | 8.1  | 2.67  |
| Khan                                     | S159 | 2016 | Lahore, Pakistan           |             | 40     | 60   | 15   | 2.67  |
| Ateeq                                    | S160 | 2023 | Lahore, Pakistan           |             | 60     | 35.0 | 3.3  | 10.5  |
|                                          |      |      |                            |             |        |      |      |       |
| <b>SOUTH ASIA (SOUTH, CENTRAL, EAST)</b> |      |      |                            |             |        |      |      |       |
|                                          |      |      |                            |             |        |      |      |       |
| Asaduzzaman                              | S161 | 2024 | Dhaka, Bangladesh          |             | 200    | 0    | 2.00 | 0.11* |

|                  |      |      |                                         |           |        |      |       |       |
|------------------|------|------|-----------------------------------------|-----------|--------|------|-------|-------|
| Kuruville        | S162 | 1978 | Udupi, Karnataka, India                 |           | 8,496  | 0.38 | 1.13  | 0.33  |
| Datta            | S163 | 1983 | Calcutta, India                         |           | 24,007 | 0.13 | 0.09  | 1.44  |
| Reddy            | S164 | 1987 | Kakinada, India                         |           | 3,675  | 0.08 | 0.19  | 0.43  |
| Kalivayayi       | S165 | 1997 | Hyderabad, India                        |           | 4,029  | 0.22 | 0.52  | 0.42  |
| Dandona          | S166 | 2002 | Mahabubnagar District, Telangana, India |           | 4,074  | 0.54 | 1.33  | 0.41  |
| Singh            | S167 | 2011 | Bhopal, India                           |           | 20,800 | 0.04 | 0.06  | 0.69  |
| Kemmanu          | S168 | 2016 | Karnataka, India                        |           | 23,100 | 0.11 | 0.34  | 0.33  |
| Akarkar          | S169 | 2019 | Goa, India                              |           | 817    | 0.86 | 0.24  | 3.50  |
| Saxena           | S170 | 2019 | Indore District, Madhya Pradesh, India  |           | 1,322  | 0.76 | 2.04  | 0.37  |
| Agrawal          | S171 | 2020 | Raipur, India                           |           | 1,557  | 0    | 0.19  | 0.14* |
| Atiya            | S172 | 2020 | Chennai, India                          |           | 75     | 0    | 12.00 | 0.53* |
|                  |      |      |                                         |           |        |      |       |       |
| <b>EAST ASIA</b> |      |      |                                         |           |        |      |       |       |
|                  |      |      |                                         |           |        |      |       |       |
| Liang            | S173 | 1984 | Taiwan, China                           |           | 5,507  | 0.83 | 0.86  | 0.97  |
| Wang             | S174 | 1989 | Taiwan, China                           |           | 11,806 | 0.34 | 0.47  | 0.72  |
| Ji               | S175 | 1994 | Xinjiang, China                         | Kazaks    | 4,125  | 0.39 | 0.78  | 0.50  |
| See              | S176 | 1996 | Taiwan, China                           |           | 862    | 0.46 | 0.93  | 0.50  |
| He               | S177 | 2004 | Guangzhou, China                        |           | 4,364  | 0.42 | 2.58  | 0.16  |
| He               | S178 | 2007 | Yangxi, China                           |           | 2,454  | 0.37 | 1.22  | 0.30  |
| Lai              | S179 | 2009 | Taiwan, China                           |           | 618    | 0.49 | 0.32  | 1.53  |
| Fan              | S180 | 2011 | Hong Kong, China                        | 1996-97   | 601    | 0.50 | 1.83  | 0.27  |
| Fan              | S180 | 2011 | Hong Kong, China                        | 2006-07   | 823    | 0.24 | 1.46  | 0.17  |
| Jin              | S181 | 2011 | Nanchang, China                         |           | 4,376  | 0.73 | 1.49  | 0.49  |
| Pi               | S182 | 2012 | Yongchuan, China                        |           | 3,079  | 0.10 | 0.16  | 0.63  |
| Lin              | S183 | 2013 | Shantou, China                          |           | 7,464  | 0.19 | 2.71  | 0.07  |
| Fu               | S184 | 2014 | Anyang, China                           |           | 2,260  | 0.08 | 4.51  | 0.02  |
| Zhu              | S185 | 2015 | Nanjing, China                          |           | 5,831  | 0.77 | 4.63  | 0.17  |
| Chen             | S186 | 2016 | Nanjing, China                          |           | 5,667  | 0.76 | 4.57  | 0.16  |
| Pan              | S187 | 2017 | Yunnan, China                           |           | 9,263  | 0.30 | 2.85  | 0.11  |
| Zhu              | S188 | 2019 | Yunnan, China                           |           | 3,050  | 0.16 | 1.74  | 0.09  |
| Chen             | S189 | 2021 | Nanjing, China                          | 3 yrs     | 2,018  | 0.20 | 2.23  | 0.09  |
| Chen             | S189 | 2021 | Nanjing, China                          | 4-5 yrs   | 1,766  | 0.34 | 3.23  | 0.11  |
| Lu               | S190 | 2008 | Maqin County, Tibet                     |           | 1,084  | 0.37 | 2.12  | 0.17  |
| He H             | S191 | 2020 | Lhasa, Tibet, China                     |           | 1,856  | 0.4  | 2.3   | 0.19  |
| Wang             | S192 | 2021 | Nanjing, China                          |           | 1,986  | 0.56 | 4.84  | 0.12  |
| Zhang            | S193 | 2021 | Hong Kong, China                        |           | 4,273  | 0.28 | 2.74  | 0.10  |
|                  |      |      |                                         |           |        |      |       |       |
| Nakagawa         | S194 | 1954 | Sapporo, Japan                          |           | 4,171  | 0.26 | 1.25  | 0.21  |
| Majima           | S195 | 1960 | Tokyo, Japan                            |           | 3,033  | 0.23 | 0.33  | 0.70  |
| Nakajima         | S196 | 1960 | Shizuoka, Japan                         |           | 2,874  | 0.10 | 0.17  | 0.60  |
| Nakajima         | S196 | 1960 | Shizuoka, Japan                         |           | 1,159  | 0.43 | 0.17  | 2.50  |
| Harada           | S197 | 1961 | Tokyo, Japan                            |           | 1,058  | 1.04 | 0.95  | 1.10  |
| Yazawa           | S198 | 1973 | Hoya City, Japan                        | 6-12 yrs  | 7,989  | 0.24 | 0.41  | 0.58  |
| Yazawa           | S198 | 1973 | Hoya City, Japan                        | 12-15 yrs | 2,700  | 0.04 | 0.44  | 0.08  |
| Inatomi          | S199 | 1976 | Tokyo, Japan                            |           | 4,963  | 0.28 | 0.28  | 1.00  |
| Maruo            | S200 | 1977 | Tokyo, Japan                            |           | 10,512 | 0.95 | 1.23  | 0.79  |
| Matsuo           | S201 | 2005 | Okayama, Japan                          | 2003      | 86,531 | 0.28 | 0.69  | 0.41  |
| Matsuo           | S202 | 2007 | Okayama, Japan                          | 2005      | 84,619 | 0.22 | 0.62  | 0.36  |

|                                            |      |      |                            |           |        |      |      |       |
|--------------------------------------------|------|------|----------------------------|-----------|--------|------|------|-------|
| Matsuo                                     | S203 | 2007 | Okayama, Japan             | 1.5 yrs   | 33,929 | 0.02 | 0.04 | 0.50  |
| Goseki                                     | S204 | 2017 | Tokyo, Japan               |           | 1,214  | 0.16 | 1.15 | 0.14  |
| Satou                                      | S205 | 2018 | Tochigi, Japan             |           | 760    | 0.26 | 1.45 | 0.15  |
|                                            |      |      |                            |           |        |      |      |       |
| Yu                                         | S206 | 1991 | Seoul, Korea               |           | 1,211  | 0.33 | 0.66 | 0.50  |
| Rah                                        | S207 | 1997 | Seoul, Korea               |           | 9,054  | 0.66 | 2.89 | 0.23  |
| Yoon                                       | S208 | 2011 | Korea                      | 3-95 yrs  | 14,464 | 0.20 | 1.10 | 0.18  |
| Lee                                        | S209 | 2017 | Korea                      | 3-70+ yrs | 30,538 | 0.20 | 0.99 | 0.20  |
| Han                                        | S210 | 2018 | Korea                      | 2008-11   | 5,935  | 0.22 | 1.42 | 0.15  |
|                                            |      |      |                            |           |        |      |      |       |
| Casson                                     | S211 | 2012 | Vientiane, Laos            |           | 2,842  | 0.21 | 1.13 | 0.19  |
| Teoh                                       | S212 | 1982 | Petaling Jaya, Malaysia    |           | 650    | 0.15 | 1.85 | 0.08  |
| Goh                                        | S213 | 2005 | Kuala Lumpur, Malaysia     |           | 4,634  | 0.15 | 0.52 | 0.29  |
| Premseenthil                               | S214 | 2013 | Kuching, Malaysia          |           | 400    | 0    | 0.25 | 0.33* |
| Chew                                       | S215 | 2018 | Segamat, Malaysia          |           | 1,287  | 0.08 | 0.16 | 0.50  |
|                                            |      |      |                            |           |        |      |      |       |
| Nepal                                      | S216 | 2003 | Kathmandu, Nepal           |           | 1,100  | 0.09 | 1.55 | 0.06  |
| Shrestha                                   | S217 | 2006 | Kathmandu, Nepal           |           | 1,816  | 0.11 | 1.10 | 0.10  |
| Sherpa                                     | S218 | 2011 | Dhulikhel, Nepal           |           | 466    | 0    | 0.43 | 0.20* |
| Shrestha                                   | S219 | 2011 | Kathmandu, Nepal           |           | 4,228  | 0.24 | 2.89 | 0.08  |
| Pant                                       | S220 | 2014 | Kathmandu, Nepal           |           | 569    | 0.35 | 2.64 | 0.13  |
| Sherpa                                     | S221 | 2014 | Chitwan District, Nepal    |           | 332    | 0    | 3.01 | 0.48* |
|                                            |      |      |                            |           |        |      |      |       |
| Chia                                       | S222 | 2010 | Singapore (STARS)          |           | 2,992  | 0.10 | 0.67 | 0.15  |
| Konyama                                    | S223 | 1972 | Bangkok, Thailand          |           | 2,415  | 0.37 | 0.75 | 0.50  |
| Mahachaiyakul                              | S224 | 1997 | Bangkok, Thailand          |           | 1,219  | 0    | 0.16 | 0.20* |
| Tananuvat                                  | S225 | 2004 | Chiang Mai, Thailand       |           | 1,084  | 0.26 | 0.64 | 0.41  |
| Jenchitr                                   | S226 | 2012 | Bangkok, Thailand          |           | 1,780  | 1.57 | 0.98 | 1.65  |
| Paudel                                     | S227 | 2014 | Ba Ria (Vung Tau), Vietnam |           | 2,238  | 0.13 | 0    | 7*    |
|                                            |      |      |                            |           |        |      |      |       |
| <b>OCEANIA (AUSTRALASIA AND MELANESIA)</b> |      |      |                            |           |        |      |      |       |
|                                            |      |      |                            |           |        |      |      |       |
| <b>INDIGENOUS</b>                          |      |      |                            |           |        |      |      |       |
| Mann                                       | S228 | 1966 | Australia (Northwest)      |           | 1,680  | 0    | 0.30 | 0.09* |
| Mann                                       | S229 | 1968 | Australia (Desert)         |           | 1,014  | 0    | 0.25 | 0.14* |
| Royal Austral College                      | S230 | 1980 | Australia                  |           | 62,116 | 0.18 | 0.55 | 0.33  |
| Hopkins                                    | S231 | 2016 | Queensland, Australia      |           | 181    | 0    | 0    | 1.00  |
| Ward                                       | S232 | 1955 | Fiji                       |           | 4,000  | 0    | 0    | 1.00  |
| Mann                                       | S233 | 1969 | New Zealand, Maori         |           | 333    | 1.5  | 1.2  | 1.25  |
| Mann                                       | S234 | 1956 | Papua-New Guinea           |           | 13,751 | 0.11 | 0.04 | 3.0   |
| Elliott                                    | S235 | 1965 | Tokelau Islands            |           | 1,862  | 0    | 0    | 1.00  |
| Elliott                                    | S235 | 1965 | Tokelau Islands            |           | 476    | 0    | 0    | 1.00  |
| Elliott                                    | S235 | 1965 | Tokelau Islands            |           | 884    | 0    | 0    | 1.00  |
| Verlee                                     | S236 | 1968 | Solomon Islands            |           | 616    | 0.16 | 1.79 | 0.09  |
|                                            |      |      |                            |           |        |      |      |       |
| <b>CAUCASIAN</b>                           |      |      |                            |           |        |      |      |       |
| Brown                                      | S237 | 1976 | Sydney, Australia          |           | 5,426  | 1.79 | 1.64 | 1.09  |
| Macfarlane                                 | S238 | 1987 | Brisbane, Australia        |           | 877    | 1.60 | 0.91 | 1.75  |

|                                   |      |      |                          |          |        |      |      |       |
|-----------------------------------|------|------|--------------------------|----------|--------|------|------|-------|
| Robaei                            | S239 | 2006 | Sydney, Australia        |          | 1,107  | 1.99 | 1.08 | 1.83  |
| Robaei                            | S240 | 2006 | Sydney, Australia        |          | 1,406  | 1.14 | 0.85 | 1.34  |
| Sharbini                          | S241 | 2015 | Sydney, Australia        |          | 1,131  | 1.24 | 2.12 | 0.58  |
| Ward                              | S232 | 1955 | Fiji                     |          | 438    | 0.46 | 0    | 5*    |
| Simpson                           | S242 | 1984 | New Zealand (West)       |          | 988    | 2.02 | 0.61 | 3.33  |
| <b>MULTIPLE ETHNICITIES</b>       |      |      |                          |          |        |      |      |       |
| Robaei                            | S239 | 2006 | Sydney, Australia        |          | 1,739  | 1.50 | 0.81 | 1.86  |
| Robaei                            | S240 | 2006 | Sydney, Australia        |          | 2,353  | 0.89 | 1.15 | 0.78  |
| Leone                             | S243 | 2009 | Sydney, Australia        |          | 1,740  | 1.49 | 0.80 | 1.86  |
| Pai                               | S244 | 2013 | Sydney, Australia        |          | 1,188  | 0.34 | 0.08 | 4.00  |
| Sharbini                          | S241 | 2015 | Sydney, Australia        |          | 491    | 1.22 | 1.83 | 0.67  |
| Ward                              | S232 | 1955 | Fiji                     |          | 943    | 1.27 | 0.21 | 6.00  |
| Anstice                           | S245 | 2012 | New Zealand              |          | 3,273  | 0.18 | 0.06 | 3.00  |
| <b>EAST ASIAN (NON-CAUCASIAN)</b> |      |      |                          |          |        |      |      |       |
| Robaei                            | S239 | 2006 | Sydney, Australia        |          | 632    | 0.79 | 1.27 | 0.63  |
| Robaei                            | S240 | 2006 | Sydney, Australia        |          | 947    | 0.53 | 1.58 | 0.34  |
| Sharbini                          | S241 | 2015 | Sydney, Australia        |          | 516    | 0.39 | 1.74 | 0.22  |
| Ward                              | S232 | 1955 | Fiji                     |          | 205    | 0.49 | 0.98 | 0.50  |
| <b>DOWN SYNDROME</b>              |      |      |                          |          |        |      |      |       |
| Fanning                           | S246 | 1971 | Brisbane, Australia      |          | 24     | 25.0 | 4.2  | 5.95  |
| <b>NORTH AMERICA</b>              |      |      |                          |          |        |      |      |       |
| <b>CAUCASIAN</b>                  |      |      |                          |          |        |      |      |       |
| Kornder                           | S247 | 1974 | British Columbia, Canada |          | 1,074  | 2.05 | 1.02 | 2.00  |
| Kornder                           | S248 | 1974 | British Columbia, Canada |          | 2,619  | 2.71 | 1.72 | 1.59  |
| Johnson                           | S249 | 1984 | Nain, Labrador, Canada   |          | 80     | 0    | 1.25 | 0.33* |
| Woodruff                          | S250 | 1986 | New Brunswick, Canada    |          | 6,080  | 2.70 | 1.28 | 2.11  |
| Robinson                          | S251 | 1999 | Ontario, Canada          |          | 3,434  | 0.84 | 0.20 | 4.14  |
| Collins                           | S252 | 1925 | NY, IN, SC, USA          |          | 12,134 | 0.73 | 0.17 | 4.29  |
| Knapp                             | S253 | 1931 | Duluth, MN, USA          | adults   | 4,424  | 0.14 | 0.20 | 0.67  |
| Knapp                             | S253 | 1931 | Duluth, MN, USA          | children | 12,253 | 1.77 | 0.58 | 3.06  |
| Downing                           | S254 | 1945 | USA                      | nation   | 60,000 | 1.43 | 0.65 | 2.20  |
| Blum                              | S255 | 1959 | Oakland, USA             |          | 1,163  | 3.18 | 1.46 | 2.18  |
| Roberts                           | S256 | 1972 | Multiple sites, USA      | 1963-65  | 7,119  | 1.12 | 0.60 | 1.88  |
| Roberts                           | S257 | 1975 | Multiple sites, USA      | 1971-72  | 6,768  | 1.46 | 2.47 | 0.59  |
| Roberts                           | S258 | 1978 | Multiple sites, USA      |          | 10,126 | 1.3  | 2.0  | 0.65  |
| Chew                              | S259 | 1994 | Multiple sites, USA      | 1966-72  | 17,931 | 4.13 | 1.27 | 3.25  |
| Friedman                          | S260 | 2009 | Baltimore, MD, USA       |          | 771    | 1.43 | 2.08 | 0.83  |
| Cotter                            | S261 | 2011 | Baltimore, MD, USA       |          | 1,861  | 1.77 | 1.07 | 1.65  |
| McKean-Cowdin                     | S262 | 2013 | Riverside, CA, USA       |          | 1,514  | 2.31 | 0.73 | 3.16  |
| <b>NATIVE AMERICAN</b>            |      |      |                          |          |        |      |      |       |
| Wick                              | S263 | 1976 | South Dakota, USA        |          | 398    | 0.25 | 3.51 | 0.07  |
| Adler-Grinberg                    | S264 | 1986 | Dakota, USA              |          | 1,886  | 0.27 | 0.95 | 0.28  |

|                          |      |      |                        |         |        |      |      |       |
|--------------------------|------|------|------------------------|---------|--------|------|------|-------|
| Maples                   | S265 | 1980 | Oklahoma, USA          |         | 792    | 1.14 | 1.14 | 1.00  |
| Maples                   | S265 | 1980 | Minnesota, USA         |         | 5,133  | 0.21 | 0.23 | 0.92  |
| Lang                     | S266 | 2007 | Alaska, USA            |         | 80     | 1.25 | 5.00 | 0.25  |
| Garvey                   | S267 | 2010 | Arizona, USA           |         | 909    | 0.33 | 0.88 | 0.38  |
| Chiarelli                | S268 | 2013 | Ontario, Canada        |         | 146    | 0.68 | 3.42 | 0.20  |
| <b>INUIT (ESKIMO)</b>    |      |      |                        |         |        |      |      |       |
| Woodruff                 | S269 | 1976 | Belcher Island, Canada |         | 138    | 3.62 | 2.17 | 1.67  |
| Johnson                  | S249 | 1984 | Nain, Labrador, Canada |         | 330    | 0.91 | 0.30 | 3.00  |
| <b>AFRICAN AMERICAN</b>  |      |      |                        |         |        |      |      |       |
| Friendly                 | S270 | 1978 | Washington DC, USA     |         | 633    | 0.95 | 0.16 | 6.00  |
| Roberts                  | S258 | 1978 | Multiple sites, USA    |         | 1,205  | 0.6  | 2.7  | 0.22  |
| Chew                     | S259 | 1994 | Multiple sites, USA    | 1966-72 | 19,619 | 2.28 | 1.34 | 1.71  |
| Preslan                  | S271 | 1996 | Baltimore, MD, USA     |         | 680    | 2.79 | 0.29 | 9.50  |
| Preslan                  | S272 | 1998 | Baltimore, MD, USA     |         | 285    | 1.75 | 1.40 | 1.25  |
| Multi-ethnic             | S273 | 2008 | Los Angeles, CA, USA   |         | 3,005  | 1.10 | 1.36 | 0.80  |
| Friedman                 | S260 | 2009 | Baltimore, MD, USA     |         | 994    | 1.21 | 1.21 | 1.00  |
| Cotter                   | S261 | 2011 | Baltimore, MD, USA     |         | 3,604  | 1.11 | 1.11 | 1.00  |
| <b>LATINO / HISPANIC</b> |      |      |                        |         |        |      |      |       |
| Choi                     | S274 | 1995 | Los Angeles, CA, USA   |         | 2,192  | 0.59 | 0.64 | 0.92  |
| Multi-ethnic             | S273 | 2008 | Los Angeles, CA, USA   |         | 3,003  | 0.87 | 1.47 | 0.59  |
| Cotter                   | S261 | 2011 | Baltimore, MD, USA     |         | 3,026  | 0.93 | 1.35 | 0.68  |
| <b>DOWN SYNDROME</b>     |      |      |                        |         |        |      |      |       |
| Levinson                 | S275 | 1955 | Chicago, USA           |         | 50     | 12   | 2    | 6.0   |
| Shapiro                  | S276 | 1985 | Wisconsin, USA         |         | 53     | 41.5 | 1.9  | 22.0  |
| Roizen                   | S277 | 1994 | Chicago, USA           |         | 77     | 26   | 1    | 26    |
| Averbuch-Heller          | S278 | 1999 | Cleveland, OH, USA     |         | 26     | 61.5 | 15.4 | 4.0   |
| Cullen                   | S279 | 1963 | Maryland, USA          |         | 143    | 32.2 | 0    | 93*   |
| Jaeger                   | S280 | 1980 | Philadelphia, PA, USA  |         | 75     | 37.3 | 2.7  | 14.0  |
| Warshowsky               | S281 | 1981 | New York, USA          |         | 39     | 35.9 | 0    | 29*   |
| Krinsky-McHale           | S282 | 2012 | New York, USA          |         | 355    | 17.4 | 0.4  | 39.5  |
| <b>LATIN AMERICA</b>     |      |      |                        |         |        |      |      |       |
| <b>NATIVE AMERICAN</b>   |      |      |                        |         |        |      |      |       |
| Urrets-Zavalía           | S283 | 1961 | La Paz, Bolivia        |         | 2,089  | 0.29 | 1.72 | 0.17  |
| Urrets-Zavalía           | S283 | 1961 | La Paz, Bolivia        |         | 2,526  | 0.08 | 0.20 | 0.40  |
| Belfort-Mattos           | S284 | 1970 | Amazon, Brazil         |         | 81     | 0    | 3.70 | 0.14* |
| Germano                  | S285 | 2017 | Avai City, Brazil      |         | 377    | 0    | 1.19 | 0.11* |

| LATINO / HISPANIC |      |      |                        |  |        |      |      |      |
|-------------------|------|------|------------------------|--|--------|------|------|------|
| Couto Jr          | S286 | 2007 | Rio de Janeiro, Brazil |  | 1,800  | 0.78 | 0.61 | 1.27 |
| Couto Jr          | S287 | 2010 | Rio de Janeiro, Brazil |  | 1,800  | 0.22 | 0.11 | 2.00 |
| Maul              | S288 | 2000 | Santiago, Chile        |  | 5,303  | 2.34 | 7.52 | 0.24 |
| Vasquez           | S289 | 2014 | Bogota, Colombia       |  | 855    | 1.64 | 1.40 | 1.17 |
| Márquez Galvis    | S290 | 2017 | Pereira, Colombia      |  | 718    | 0.56 | 0.56 | 1.00 |
| Molinari          | S291 | 2005 | Sierra, Ecuador        |  | 6,143  | 0.36 | 0.28 | 1.29 |
| Juárez-Muñoz      | S292 | 1996 | Mexico City, Mexico    |  | 343    | 0.58 | 0.58 | 1.00 |
| Ohlsson           | S293 | 2003 | Monterrey, Mexico      |  | 1,035  | 0.68 | 0.58 | 1.17 |
| CAUCASIAN         |      |      |                        |  |        |      |      |      |
| Costa             | S294 | 1979 | Sao Paulo, Brazil      |  | 569    | 0.88 | 0.53 | 1.67 |
| Schimiti          | S295 | 2001 | Ibipora, Brazil        |  | 13,471 | 0.54 | 0.25 | 2.16 |
| Beer              | S296 | 2003 | Sao Paulo, Brazil      |  | 476    | 0.84 | 2.52 | 0.33 |
| Beer              | S296 | 2003 | Sao Paulo, Brazil      |  | 2,164  | 0.92 | 0.51 | 1.82 |
| Garcia            | S297 | 2004 | Parana, Brazil         |  | 1,015  | 0.59 | 2.17 | 0.27 |
| de Sousa          | S298 | 2012 | Sao Paulo, Brazil      |  | 500    | 0.20 | 0.60 | 0.3  |
| Shimauti          | S299 | 2012 | Sao Paulo, Brazil      |  | 10,994 | 0.63 | 0.52 | 1.21 |
| Schaal            | S300 | 2018 | Brazil (South East)    |  | 1,852  | 1.13 | 0.32 | 3.50 |
| EAST ASIAN        |      |      |                        |  |        |      |      |      |
| Beiguelman        | S301 | 1964 | Sao Paulo, Brazil      |  | 296    | 4.05 | 1.35 | 3.00 |

Data from von Bartheld et al., 2025<sup>22</sup> (for References – see Supplemental Material S1)

\* 0.5 was added to each value for the ET/XT ratio when the value was 0, to avoid a zero in the denominator or numerator, according to Sweeting et al., 2004.<sup>52</sup> Ref, reference number from the Supplemental Material S1.

**Supplemental Table S3: Pairs of ET/XT ratio and IPD within populations for regression analysis**

| REGION                     | n    | IPD (mm) | References                    | Ref #      | n     | ET/XT Ratio | References                                                                              | Ref #                                  |
|----------------------------|------|----------|-------------------------------|------------|-------|-------------|-----------------------------------------------------------------------------------------|----------------------------------------|
| <b>EUROPE</b>              |      |          |                               |            |       |             |                                                                                         |                                        |
| Sweden                     | 191  | 62.1     | Holmgren                      | 60         | 19960 | 4.72        | Nordlow, Koehler, Lennerstrand, Rasmussen, Kvarnstroem, Ohlsson, Aring, Holmstrom, Abdi | S40, 41, 42,43, 44, 45, 46, 47, 48, 49 |
| Finland                    | 40   | 60.4     | Hakala                        | 81         | 2918  | 1.73        | Rantanen, Laatikainen, Kaakinen, Tuppurainen                                            | S10, 11, 12, 13, 14                    |
| Russia (West)/Belarus      | 296  | 64.05    | Koegel                        | 65         | 2034  | 1.21        | Maimulov                                                                                | S37                                    |
| Denmark                    | 554  | 61.95    | Fledelius, Bertelsen, Kisling | 37, 67, 70 | 30444 | 3.72        | Frandsen, Sandfeld, Hultman                                                             | S7, 8, 9                               |
| Denmark (Down Syndr)       | 71   | 55.4     | Kisling                       | 70         | 632   | 49.04       | Skeller, Oster, Haargaard                                                               | S66, 67, 68                            |
| North England              | 136  | 60.54    | Howarth, Wilkinson            | 74, 77     | 7064  | 3.27        | O'Connor, Hu, Toufeeq, Bruce                                                            | S60, 62, 63, 64                        |
| Central England            | 1840 | 63.70    | Pointer, Babalola             | 9, 69      | 12710 | 4.13        | Williams, Plotnikov                                                                     | S61, 63                                |
| London and East UK         | 200  | 62.45    | Kerwood                       | 68         | 23976 | 6.39        | Worth, Tyser, Stayte, Newman                                                            | S53, 54, 58, 59                        |
| Wales, Ulster (Down Syndr) | 15   | 52.07    | Woodhouse, Doyle              | 56, 87     | 258   | 24.26       | Woodhouse, Bromham, Cregg, Stewart                                                      | S75, 76, 77, 78                        |
| London (Down Syndr)        | 101  | 52.50    | Brushfield, Lowe              | 85, 86     | 507   | 142.6       | Pearce, Ormond, Brushfield, Engler, Lowe, Oladiwura                                     | S69, 70, 71, 72, 73, 74                |
| East England (Down Syndr)  | 33   | 55.5     | Kerwood                       | 68         | 28    | 15          | Pearce                                                                                  | S69                                    |
| Belgium                    | 50   | 60.0     | Mommaerts                     | 78         | 1215  | 8.00        | Vereecken                                                                               | S3                                     |
| Germany                    | 7208 | 61.23    | Becker, Beselin,              | 58, 61     | 36677 | 19.21       | Cohn, Schleich, De                                                                      | S16, 17,                               |

|                                                  |      |                |                                                                    |                  |       |       |                                                                                    |                                                     |
|--------------------------------------------------|------|----------------|--------------------------------------------------------------------|------------------|-------|-------|------------------------------------------------------------------------------------|-----------------------------------------------------|
|                                                  |      |                | Seggel,<br>Speidel,<br>Helmbold,<br>Guenther,<br>Zilch,<br>Schuetz |                  |       |       | Decker,<br>Schuette,<br>Toppel,<br>Haase,<br>Russmann,<br>Kasman-<br>Keller, Fiess | 19,<br>20,<br>21,<br>22,<br>23.<br>24,<br>25,<br>26 |
| France                                           | 1421 | 61.19<br>60.99 | Garrett,<br>Mestre,<br>Flament                                     | 71,<br>14,<br>82 | 2318  | 13.4  | Speeg-<br>Schatz                                                                   | S15                                                 |
| Spain                                            | 43   | 62.98          | Garcia-<br>Lazaro,<br>Lupon-Bas                                    | 79,<br>80        | 3031  | 3.46  | Delgado-<br>Molina,<br>Martinez                                                    | S38,<br>39                                          |
| Switzerland                                      | 225  | 61.47          | Pflugler,<br>Bruckner                                              | 59,<br>72        | 10637 | 4.00  | Voirol,<br>Franceschetti<br>, Gansner                                              | S50,<br>51,<br>52                                   |
| Switzerland (Down<br>Syndr)                      | 10   | 50.7           | Vontobel                                                           | 54               | 445   | 10.55 | Vontobel,<br>Gnad                                                                  | S79,<br>80                                          |
| Croatia                                          | 200  | 63             | Filipovic                                                          | 76               | 20045 | 1.16  | Karlica                                                                            | S6                                                  |
| Italy (Down Syndr)                               | 15   | 60.4           | Missiroli                                                          | 55               | 224   | 7.74  | Missiroli,<br>Fimiani,<br>Purpura                                                  | S81,<br>82,<br>83                                   |
|                                                  |      |                |                                                                    |                  |       |       |                                                                                    |                                                     |
| <b>AFRICA</b>                                    |      |                |                                                                    |                  |       |       |                                                                                    |                                                     |
|                                                  |      |                |                                                                    |                  |       |       |                                                                                    |                                                     |
| Ghana                                            | 702  | 67.01          | Ilechie,<br>Kumah                                                  | 91,<br>95        | 3313  | 0.26  | Kumah,<br>Nartey,<br>Abdul-Kabir                                                   | S101<br>,102,<br>103                                |
| Nigeria, Enugu (Igbo)                            | 3080 | 74.18          | Osunwoke,<br>Esomonu,<br>Adekunle                                  | 93,<br>94,<br>98 | 998   | 0.33  | Ezinne                                                                             | S113                                                |
| Nigeria (East) Ilorin,<br>Ibadan, Lagos (Yoruba) | 1599 | 67.51          | Omodele<br>Adekunle                                                | 96,<br>98,<br>99 | 10404 | 1.96  | Baiyerou-<br>Agbeja,<br>Ajaiyeoba,<br>Azonobi,<br>Ayanniyi                         | S106<br>, 108,<br>110,<br>111                       |
| Nigeria (South)                                  | 176  | 65.0           | Osunwoke                                                           | 42               | 3039  | 1.39  | Atamah,<br>Akpe,<br>Atuanya                                                        | S109<br>, 112,<br>114                               |
| Nigeria (Down Syndr)                             | 42   | 59.5           | Adio                                                               | 101              | 42    | 2.96  | Adio                                                                               | S115                                                |
| Zaire / Gabon                                    | 111  | 66.18          | Kikudi,<br>Kaimbo                                                  | 30,<br>89        | 1931  | 0.20  | Holm                                                                               | 100                                                 |
| Sudan                                            | 920  | 62.3           | Siraj                                                              | 107              | 3350  | 2.10  | Zeidan,<br>Taha,<br>Alrasheed                                                      | S95,<br>96,<br>97                                   |
| Uganda / Tanzania                                | 104  | 66.2           | McAllister                                                         | 105              | 400   | 1.0   | Kingo                                                                              | 98                                                  |
| Egypt                                            | 2683 | 61.76          | El-<br>Mokadem,<br>Elrazky                                         | 103,<br>109      | 6613  | 7.00  | El Sahn,<br>Abdelrahman                                                            | S84,<br>85                                          |
|                                                  |      |                |                                                                    |                  |       |       |                                                                                    |                                                     |
| <b>MIDDLE EAST</b>                               |      |                |                                                                    |                  |       |       |                                                                                    |                                                     |
|                                                  |      |                |                                                                    |                  |       |       |                                                                                    |                                                     |
| Turkey (Northwest)                               | 2361 | 60.50          | Ozturk,<br>Ozsoy,                                                  | 120,<br>122,     | 25205 | 1.52  | Turacli,<br>Gursoy,                                                                | S142<br>, 145,                                      |

|                                                                        |       |       |                                                                                        |                                                             |       |      |                                                    |                                               |
|------------------------------------------------------------------------|-------|-------|----------------------------------------------------------------------------------------|-------------------------------------------------------------|-------|------|----------------------------------------------------|-----------------------------------------------|
|                                                                        |       |       | Aksu, Ilhan,<br>Yildirim,<br>Ozdemir                                                   | 123,<br>129,<br>133                                         |       |      | Celikay                                            | 146                                           |
| Turkey (Southeast)                                                     | 4764  | 63.02 | Bozkir,<br>Beden,<br>Aslankurt,<br>Gudek,<br>Direk,<br>Ozdemir,<br>Bahsi,<br>Hatipoglu | 117,<br>121,<br>127,<br>128,<br>131,<br>133,<br>138,<br>143 | 21178 | 1.35 | Aslan, Caca                                        | S143<br>, 144                                 |
| Israel                                                                 | 199   | 60.6  | Gantz                                                                                  | 139                                                         | 47775 | 2.85 | Neumann,<br>Friedman,<br>Friedmann                 | S132<br>, 133,<br>134                         |
| Iraq                                                                   | 177   | 62.25 | Kassab,<br>Abbas                                                                       | 118,<br>144                                                 | 9866  | 2.27 | Halboos,<br>Mukhaiser                              | S129<br>, 130                                 |
| Saudi Arabia Central<br>(Riyadh)                                       | 903   | 61.87 | Osuobeni,<br>Al-El-<br>Sheikh,<br>Alanazi,<br>Eltahir                                  | 112,<br>113,<br>114,<br>126,<br>145                         | 833   | 1.50 | Badr                                               | S138                                          |
| Saudi Arabia<br>(Southwest)                                            | 228   | 61.9  | Majeed                                                                                 | 134                                                         | 971   | 1.90 | Albolfotouh,<br>Bardisi                            | S139<br>, 140                                 |
| Azerbaijan                                                             | 1,832 | 64.34 | Sahbaz                                                                                 | 136,<br>137                                                 | 2700  | 0.23 | Abdiyeva                                           | S116                                          |
| Iran (West, Tehran)                                                    | 1834  | 62.18 | Bayani,<br>Fesharaki,<br>Moravej                                                       | 119,<br>125,<br>132                                         | 6741  | 0.68 | Jamali,<br>Kwak,<br>Faghihi,<br>Rajavi,<br>Hashemi | S118<br>, 121,<br>120,<br>122,<br>125,<br>127 |
| Iran (East)                                                            | 100   | 62.85 | Mahdavi<br>zad<br>i                                                                    | 124                                                         | 15355 | 0.47 | Faghihi,<br>Yekta,<br>Hamidi,<br>Derakshan         | S120<br>, 122,<br>128,<br>130                 |
| <b>SOUTH ASIA</b>                                                      |       |       |                                                                                        |                                                             |       |      |                                                    |                                               |
| Pakistan S, India W                                                    | 3225  | 62.23 | Shah,<br>Gupta,<br>Alkhairy,<br>Shah,<br>Hayat,<br>Ahmed,                              | 43,<br>147,<br>156,<br>162,<br>164,<br>170                  | 25779 | 2.06 | Gupta, Bedi,<br>Mohan,<br>Shaikh                   | S150<br>, 152,<br>153,<br>155                 |
| Pakistan N                                                             | 769   | 61.80 | Hussain,<br>Arshad,<br>Batool,<br>Saifullah,<br>Malik                                  | 150,<br>158,<br>161,<br>163,<br>171                         | 1306  | 0.33 | Awan                                               | S154                                          |
| Pakistan NW                                                            | 100   | 62.3  | Saifullah                                                                              | 163                                                         | 1306  | 0.33 | Awan                                               | S154                                          |
| Delhi, Haryana, Punjab,<br>Chandigarh, Shimla,<br>Uttarakhand, Kashmir | 3068  | 58.78 | Singh,<br>Gupta,<br>Dhinsa,<br>Kamboj,<br>Sharma,                                      | 146,<br>147,<br>167,<br>173,<br>152,                        | 10958 | 1.19 | Agarwal,<br>Gupta,<br>Murthy                       | S149<br>, 150,<br>151                         |

|                                                           |      |       |                                                        |                                   |       |      |                                             |                          |
|-----------------------------------------------------------|------|-------|--------------------------------------------------------|-----------------------------------|-------|------|---------------------------------------------|--------------------------|
|                                                           |      |       | Gupta, Rattan, Bhalla<br>Gupta P, Bali, Nazir, Ayoub   | 157, 165, 169, 166, 148, 155, 159 |       |      |                                             |                          |
| Pakistan N / Chandigarh Down Syndr                        | 51   | 58.15 | Bhalla                                                 | 169                               | 137   | 6.1  | Qayyum, Khan, Ateeq                         | S158, 159, 160           |
| India Central (Madhya Pradesh, Maharashtra, Chhattisgarh) | 652  | 62.01 | Patil, Kini, Purkait, Bangar,                          | 149, 151, 153, 160                | 23679 | 0.64 | Singh, Saxena, Agrawal                      | S167, 170, 171           |
| India, Karnataka. Mangalore (coastal) Manipal,            | 1272 | 63.07 | Packiriswamy, Vasanthakumar, Banu, Sasidharan, Shetty  | 175, 176, 180, 182, 188           | 8496  | 0.33 | Kuruville                                   | S162                     |
| India, Bangalore region                                   | 490  | 62.78 | Shivhare, Girmallanavar, Narain, Singh AD              | 178, 189, 179, 190                | 23100 | 0.33 | Kemmanu                                     | S168                     |
| India, Chennai, Tamil Nadu,                               | 702  | 61.67 | Anitha, Sivaranjani, Neehapriya, Rupashri, Deepasakthi | 174, 183, 185, 186, 187           | 75    | 0.53 | Atiya                                       | S172                     |
| India, Telangana, Andhra Pradesh                          | 100  | 62.88 | Singh AD                                               | 190                               | 11778 | 0.42 | Dandona, Reddy, Kalikivayi                  | S166, 164, 165           |
| E. India Jharkhand, Meghalaya, Assam, Bangladesh          | 720  | 62.84 | Bandhu, Mostafa, Barman                                | 191, 177, 181                     | 24207 | 1.43 | Datta, Asaduzzaman                          | S163, 161                |
| Nepal                                                     | 1494 | 61.98 | Mishra MK, Rokaya, Mishra S, Tuladhar, Laher           | 215, 219, 221, 227, 231           | 8511  | 0.11 | Nepal, Shresthra, Sherpa, Pant              | S215, 216, 217, 220, 219 |
| <b>EAST ASIA</b>                                          |      |       |                                                        |                                   |       |      |                                             |                          |
| Thailand                                                  | 3046 | 62.71 | White, Preechawai                                      | 193, 212                          | 6498  | 0.91 | Konyama, Mahachaiyakul, Tananuvat, Jenchitr | S222, 223, 224, 225      |
| Malaysia                                                  | 2561 | 63.90 | Isa, Lu, Aziz, Al Junid, Lim                           | 211, 219, 224, 207, 226           | 5284  | 0.26 | Teoh, Goh                                   | S212, 213                |
| Vietnam                                                   | 2129 | 60.75 | White                                                  | 194                               | 2231  | 7    | Paudel                                      | S227                     |
| Singapore                                                 | 220  | 60.47 | Yu                                                     | 183                               | 2992  | 0.15 | Chia                                        | S222                     |

|                                     |      |       |                                               |                                   |               |      |                                                                                      |                                                               |
|-------------------------------------|------|-------|-----------------------------------------------|-----------------------------------|---------------|------|--------------------------------------------------------------------------------------|---------------------------------------------------------------|
| China, Taiwan                       | 206  | 60.2  | Lin                                           | 216                               | 18793         | 0.81 | Liang, Wang,<br>See, Lai                                                             | S173<br>, 174,<br>176,<br>179                                 |
| China Central                       | 3983 | 63.22 | Du, Wang J,<br>Flament                        | 208,<br>232,<br>82                | 9715          | 0.43 | Jin, Pi, Fu                                                                          | S181<br>, 182,<br>184                                         |
| China, Hongkong<br>Guangdong region | 943  | 62.83 | Quant,<br>Quant, Tang                         | 200,<br>201,<br>204               | 18555         | 0.13 | He, He, Lin,<br>Zhang                                                                | S177<br>, 178,<br>183,<br>193                                 |
| China, Shanghai,<br>Nanjing         | 103  | 62.75 | Xu Y                                          | 228                               | 9615<br>17268 | 0.14 | Zhu, Chen,<br>Chen, Wang                                                             | S185<br>, 186,<br>189,<br>190                                 |
| Korea (nation)                      | 1319 | 63.51 | Kim CJ,<br>Song, Park<br>DH                   | 199,<br>205,<br>210               | 50937         | 0.19 | Yoon, Lee,<br>Han                                                                    | S208<br>, 209,<br>210                                         |
| Korea, Seoul                        | 1404 | 65.29 | Park YK,<br>Kim JS, Kim<br>YC, Hwang          | 196,<br>18,<br>218,<br>203        | 10265         | 0.26 | Yu, Rah                                                                              | S206<br>, 207                                                 |
| Korea, Daegu, Daejeon               | 2048 | 64.29 | Park, Jung,<br>Lee                            | 38,<br>223,<br>209                | 50937         | 0.19 | Yoon, Lee,<br>Han                                                                    | S208<br>, 209,<br>210                                         |
| Japan, Sapporo                      | 281  | 62.6  | Nakagawa                                      | 195                               | 4171          | 0.21 | Nakagawa                                                                             | S194                                                          |
| Central Japan                       | 1695 | 66.09 | Lee, Sano,<br>Pryor,<br>Takahashi,<br>Flament | 209,<br>222,<br>36,<br>214,<br>82 | 36262         | 0.73 | Majima,<br>Nakajima,<br>Harada,<br>Yazawa,<br>Inatomi,<br>Maruo,<br>Goseki,<br>Satou | S195<br>, 196,<br>197,<br>198,<br>199,<br>200,<br>204,<br>205 |
| <b>OCEANIA</b>                      |      |       |                                               |                                   |               |      |                                                                                      |                                                               |
| INDIGENOUS                          |      |       |                                               |                                   |               |      |                                                                                      |                                                               |
| Maori (New Zealand)                 | 191  | 61.2  | Bridgman                                      | 233                               | 333           | 1.25 | Mann                                                                                 | S233                                                          |
| CAUCASIAN                           |      |       |                                               |                                   |               |      |                                                                                      |                                                               |
| Australia                           | 370  | 61.26 | Swan, Rana                                    | 234,<br>237                       | 9947          | 1.21 | Brown,<br>Macfarlane,<br>Robaei,<br>Sharbini,                                        | S237<br>, 238,<br>239,<br>240,<br>241                         |
| New Zealand                         | 1002 | 59.5  | Kolose                                        | 236                               | 988           | 3.33 | Simpson                                                                              | S242                                                          |
| EAST ASIAN                          |      |       |                                               |                                   |               |      |                                                                                      |                                                               |
|                                     | 126  | 60.74 | Ellakwa,<br>Rana                              | 235,<br>237                       | 2095          | 0.4  | Robaei,<br>Sharbini                                                                  | S239<br>, 240,<br>241                                         |
| DOWN SYNDROME                       |      |       |                                               |                                   |               |      |                                                                                      |                                                               |
|                                     | 24   | 53.0  | Fanning                                       | 239                               | 24            | 5.95 | Fanning                                                                              | S246                                                          |
| <b>AMERICAS</b>                     |      |       |                                               |                                   |               |      |                                                                                      |                                                               |

|                                            |       |       |                                                                                                                                                               |                                                                                                   |        |       |                                                                            |                                                                       |
|--------------------------------------------|-------|-------|---------------------------------------------------------------------------------------------------------------------------------------------------------------|---------------------------------------------------------------------------------------------------|--------|-------|----------------------------------------------------------------------------|-----------------------------------------------------------------------|
|                                            |       |       |                                                                                                                                                               |                                                                                                   |        |       |                                                                            |                                                                       |
| CAUCASIAN                                  |       |       |                                                                                                                                                               |                                                                                                   |        |       |                                                                            |                                                                       |
| Canada                                     | 2505  | 61.48 | Backman,<br>Farkas,<br>Keefe                                                                                                                                  | 244,<br>250,<br>257                                                                               | 13287  | 2.51  | Kornder,<br>Johnson,<br>Woodruff,<br>Robinson                              | S247<br>, 248,<br>249,<br>250,<br>251,                                |
| USA, East, Midwest                         | 23299 | 61.42 | Jackson,<br>Hertzberg,<br>White,<br>Hofstetter,<br>Cesario,<br>Latta,<br>Nanda, Hall,<br>Cole,<br>Barretto,<br>Pivnick,<br>Bradtmiller,<br>Dodgson,<br>Gordon | 35,<br>242,<br>243,<br>245,<br>5, 6,<br>251,<br>252,<br>253,<br>254,<br>255,<br>256,<br>4,<br>258 | 133387 | 2.33  | Collins,<br>Knapp,<br>Downing,<br>Roberts,<br>Chew,<br>Friedman,<br>Cotter | S252<br>, 253,<br>254,<br>256,<br>257,<br>258,<br>259,<br>260,<br>261 |
| USA, West Coast                            | 1435  | 62.73 | Ditmars,<br>Lucas,<br>Pryor,<br>Bogren,<br>Parciak                                                                                                            | 29,<br>241,<br>36,<br>248,<br>7                                                                   | 2677   | 2.73  | Blum,<br>McKean-<br>Cowdin                                                 | S255<br>, 262                                                         |
|                                            |       |       |                                                                                                                                                               |                                                                                                   |        |       |                                                                            |                                                                       |
| NATIVE AMERICAN                            |       |       |                                                                                                                                                               |                                                                                                   |        |       |                                                                            |                                                                       |
| USA, Canada                                | 26    | 65.12 | Dodgson                                                                                                                                                       | 4                                                                                                 | 9344   | 0.69  | Wick, Adler-<br>Grinberg,<br>Maples,<br>Lang,<br>Garvey,<br>Chiarelli      | S263<br>, 264,<br>265,<br>266,<br>267,<br>268                         |
| Latin America                              | 26    | 65.12 | Dodgson                                                                                                                                                       | 4                                                                                                 | 5073   | 0.28  | Urrets-<br>Zavalia,<br>Belfort-<br>Mattos,<br>Germano                      | S283<br>, 284,<br>285                                                 |
|                                            |       |       |                                                                                                                                                               |                                                                                                   |        |       |                                                                            |                                                                       |
| INUIT (ESKIMO)                             | 76    | 59.47 | Skeller                                                                                                                                                       | 88                                                                                                | 468    | 2.61  | Woodruff,<br>Johnson                                                       | S250<br>, 249                                                         |
|                                            |       |       |                                                                                                                                                               |                                                                                                   |        |       |                                                                            |                                                                       |
| DOWN SYNDROME                              |       |       |                                                                                                                                                               |                                                                                                   |        |       |                                                                            |                                                                       |
| Ontario, Canada                            | 22    | 55    | Lyle                                                                                                                                                          | 259                                                                                               | 206    | 17.34 | Levinson,<br>Shapiro,<br>Roizen,<br>Averbuch-<br>Heller                    | S275<br>, 276,<br>277,<br>278                                         |
| Philadelphia, PA, and<br>New York, NY, USA | 55    | 57.86 | Jaeger,<br>Krinsky-<br>McHale                                                                                                                                 | 247,<br>260                                                                                       | 612    | 48.21 | Cullen,<br>Jaeger,<br>Warshowsky,<br>Krinsky-<br>McHale                    | S279<br>, 280,<br>281,<br>282                                         |
|                                            |       |       |                                                                                                                                                               |                                                                                                   |        |       |                                                                            |                                                                       |

|                   |      |       |                                                                                                                                  |                                                                  |       |      |                                                                                   |                                                               |
|-------------------|------|-------|----------------------------------------------------------------------------------------------------------------------------------|------------------------------------------------------------------|-------|------|-----------------------------------------------------------------------------------|---------------------------------------------------------------|
| AFRICAN AMERICAN  | 3902 | 66.42 | Herskovits,<br>Davenport,<br>Cesario,<br>Murphy,<br>Latta, Cole,<br>Barretto,<br>Pivnick,<br>Bradtmiller,<br>Dodgson,<br>Parciak | 261,<br>240,<br>5,<br>262,<br>6,<br>253,<br>255,<br>256,<br>4, 7 | 30025 | 1.71 | Friendly,<br>Roberts,<br>Chew,<br>Preslan,<br>Multiethnic,<br>Friedman,<br>Cotter | S270<br>, 256,<br>259,<br>271,<br>272,<br>273,<br>260,<br>261 |
| LATINO / HISPANIC |      |       |                                                                                                                                  |                                                                  |       |      |                                                                                   |                                                               |
| USA               | 828  | 63.85 | Bradtmiller,<br>Dodgson,<br>Flament                                                                                              | 256,<br>4,<br>82                                                 | 8221  | 0.71 | Choi,<br>Multiethnic,<br>Cotter                                                   | S274<br>, 273,<br>261                                         |
| Mexico            | 271  | 65.11 | Pryor,<br>Flament                                                                                                                | 36,<br>82                                                        | 1378  | 1.13 | Juarez-<br>Munoz,<br>Ohlsson                                                      | S292<br>, 293                                                 |
| Colombia          | 1262 | 63.58 | Arenas                                                                                                                           | 267                                                              | 1573  | 1.09 | Vasquez,<br>Marquez-<br>Galvis                                                    | S289<br>, 290                                                 |
| Brazil            | 406  | 64.79 | Kawagoe,<br>Gomes,<br>Roehe, Da<br>Cunha                                                                                         | 264,<br>265,<br>266,<br>268                                      | 3600  | 1.64 | Couto Jr                                                                          | S286<br>, 287                                                 |
|                   |      |       |                                                                                                                                  |                                                                  |       |      |                                                                                   |                                                               |

Abbreviations: ET/XT ratio, esotropia/exotropia ratio; IPD, interpupillary distance; n, number of subjects; Ref #, reference number.

**Supplemental Table S4: Random pooled estimates of mean IPDs for major ethnicities with 95% confidence intervals**

| <b>Subgroups</b>                    | <b>N</b> | <b>Mean IPD (mm)</b> | <b>95% CI</b> |
|-------------------------------------|----------|----------------------|---------------|
| Caucasians with Down Syndrome       | 4        | 55.2                 | 51.6 – 58.8   |
| South Asian (Northwest)             | 32       | 61.4                 | 60.2 – 62.5   |
| Caucasians Outside of Europe        | 25       | 61.8                 | 60.5 – 63.2   |
| South Asian (South, Central, East)  | 19       | 62.4                 | 60.9 – 63.9   |
| Caucasians in Europe                | 13       | 62.4                 | 61.0 – 63.9   |
| East Asian                          | 50       | 62.8                 | 61.9 – 63.6   |
| Middle Eastern                      | 34       | 63.4                 | 62.7 - 64.0   |
| Latino/Hispanic                     | 11       | 63.9                 | 62.4 – 65.5   |
| African American                    | 10       | 66.0                 | 63.9 – 68.0   |
| West African                        | 15       | 68.0                 | 66.2 - 70.0   |
| African (Northeast, Central, South) | 9        | 68.3                 | 66.7 – 70.0   |
|                                     |          |                      |               |
| <i>Overall</i>                      | 222      | 63.2                 | 62.7-63.6     |

Abbreviations: CI, confidence interval; IPD, interpupillary distance; N, number of studies.

**Supplemental Material S1: List of References for the esotropia/exotropia (ET/XT) ratio (from von Bartheld et al., 2025)<sup>22</sup>**

1. Schenk H, Haydn M. [Experiences with the Rodenstock vision test device for children, (serial examination in the Central Children's Home of the City of Vienna)]. *Klin Monbl Augenheilkd.* 1969; 154(5):739-746.
2. Aichmair H, Grossmann W, Aichmair M, Bomze I, Fröschl K, Futschik A, Theyer I, Hirmann E, Kautzky I, Hafner J, Spadt U. [Randomized field study of the etiology of strabismus concomitans]. *Wien Klin Wochenschr.* 1992; 104(19):600-606.
3. Vereecken E, Feron A, Evens L. [The importance of early detection of strabismus and amblyopia]. *Bull Soc Belge Ophtalmol.* 1966; 143:729-739.
4. Popović-Beganović A, Zvorničanin J, Vrbljanac V, Zvorničanin E. The prevalence of refractive errors and visual impairment among school children in Brčko district, Bosnia and Herzegovina. *Semin Ophthalmol.* 2018; 33(7-8):858-868.
5. Medkova L, Bersky K, Bublikova D, Hajek F. [Appearance of strabismus in children of mothers with late pregnancy toxemia.] *Cesk Oftalmol.* 1959; 15:254-257.
6. Karlica D, Galetović D, Znaor L, Bucat M. Strabismus incidence in infants born in Split-Dalmatia County 2002-2005. *Acta Clin Croat.* 2008; 47(1):5-8.
7. Frandsen AD. Occurrence of squint: a clinical-statistical study on the prevalence of squint and associated signs in different groups and ages of the Danish population. *Acta Ophthalmol Suppl* 1960; 62:9-157.
8. Sandfeld L, Weihrach H, Tubaek G, Mortzos P. Ophthalmological data on 4.5- to 7-year-old Danish children. *Acta Ophthalmol.* 2018; 96(4):379-383.
9. Hultman O, Beth Høeg T, Munch IC, Ellervik C, la Cour M, Andersson Grönlund M, Buch Hesgaard H. The Danish Rural Eye Study: prevalence of strabismus among 3785 Danish adults - a population-based cross-sectional study. *Acta Ophthalmol.* 2019; 97(8):784-792.
10. Rantanen A, Tommila V. Prevalence of strabismus in Finland. *Acta Ophthalmol.* 1971; 49:506-509.
11. Laatikainen L, Erkkilä H. Refractive errors and other ocular findings in school children. *Acta Ophthalmol Scand.* 1980; 58:129-136.
12. Kaakinen K. Photographic screening for strabismus and high refractive errors of children aged 1-4 years. *Acta Ophthalmol (Copenh).* 1981; 59(1):38-44.
13. Kaakinen K, Kaseva H, Kause ER. Mass screening of children for strabismus or ametropia with two-flash photostereopsis. *Acta Ophthalmol (Copenh).* 1986; 64(1):105-110.
14. Tuppurainen K, Herrgård E, Martikainen A, Mäntyjärvi M. Ocular findings in prematurely born children at 5 years of age. *Graefes Arch Clin Exp Ophthalmol.* 1993; 231(5):261-266.
15. Speeg-Schatz C, Lobstein Y, Burget M, Berra O, Riehl C, Hoffmann C. A review of preschool vision screening for strabismus and amblyopia in France: 23 years experience in the Alsace region. *Binocul Vis Strabismus Q.* 2004; 19(3):151-158.
16. Cohn H. [Untersuchungen der Augen von 10060 Schulkindern nebst Vorschlägen zur Verbesserung der den Augen nachtheiligen Schuleinrichtungen.] Leipzig, Verlag von Friederich Fleischer, 1867. <https://archive.org/details/b2163693x>
17. Schleich G. [Die Augen der Schuler und Schulerinnen der Tübinger Schulen.] *Int Arch Schulhygiene.* 1905; 1:19-27.
18. Schildwächter K. [Experience with screening the R5 device in Hessen.] *Arbeitskreis Schielb.* 1972; 4:102-112.
19. De Decker W, Tessmer J. [Occurrence of squint and efficiency of treatment in Schleswig-Holstein]. *Klin Monbl Augenheilkd.* 1973; 162(1):34-42.

20. Schütte E, Groten H, Leymann J, Lizin F. [Ophthalmic and orthoptic investigations in the kindergarten (author's transl)]. *Klin Monbl Augenheilkd.* 1976; 168(4):584-590.
21. Toppel L. [Epidemiology of juvenile functional disorders of the eye]. *Fortschr Med.* 1978; 96(20):1087-1094.
22. Haase W, Mühlig HP. [The incidence of squinting in school beginners in Hamburg]. *Klin Monbl Augenheilkd.* 1979; 174(2):232-235.
23. Rüssmann W, König U, Schlimbach K, Pawlowska-Seyda D, Wirbatz B. [Refractive errors, strabismus and amblyopia in pre-school screening--experiences using a vision test in kindergarten]. *Offentl Gesundheitswes.* 1990; 52(2):77-84.
24. Käsmann-Kellner B, Heine M, Pfau B, Singer A, Ruprecht KW. [Screening for amblyopia, strabismus and refractive abnormalities in 1,030 kindergarten children]. *Klin Monbl Augenheilkd.* 1998; 213(3):166-73.
25. Fiess A, Kölb-Keerl R, Schuster AK, Knuf M, Kirchhof B, Muether PS, Bauer J. Prevalence and associated factors of strabismus in former preterm and full-term infants between 4 and 10 years of age. *BMC Ophthalmol.* 2017; 17(1):228.
26. Fiess A, Elflein HM, Urschitz MS, Pesudovs K, Münzel T, Wild PS, Michal M, Lackner KJ, Pfeiffer N, Nickels S, Schuster AK. Prevalence of strabismus and its impact on vision-related quality of life: Results from the German population-based Gutenberg Health Study. *Ophthalmology.* 2020; 127(8):1113-1122.
27. Donnelly UM, Stewart NM, Hollinger M. Prevalence and outcomes of childhood visual disorders. *Ophthalmic Epidemiol.* 2005; 12(4):243-250.
28. Montvilaite D, Grizickaite A, Augyte A, Skvarciany I, Barkus A, Usonis V. Ophthalmological follow-up of prematurely born children in preschool age: prospective study of visual acuity, refractive errors and strabismus. *Acta Med Lituanica.* 2015; 22(4):205-215.
29. Paduca A, Arnaut O, Cardaniuc C, Spinei L, Bendelic E, Bruenech JR, Lundmark PO. Epidemiology of childhood manifest strabismus in the Republic of Moldova. *Strabismus.* 2020; 28(3):128-135.
30. Holst JC, Tjaland J. [Some figures from the ophthalmological department of the schools in Oslo.] *Tidsskr Nor Laegeforen.* 1962; 82:1291-1293.
31. Aslaksen AK, Vikesdal GH, Voie MT, Rowlands M, Skranes J, Haugen OH. Visual function in Norwegian children aged 5-13 years with prenatal exposure to opioid maintenance therapy: A case-control study. *Acta Ophthalmol.* 2024; 102(4):409-420.
32. Dalz M, Gotz-Wieckowska A, Dalz M. [Schielenkrankheit bei den Kindern im Schulalter.] 107th Kongress, Deutsche Ophthalmologische Gesellschaft (DOG), Leipzig, Germany, Abstract P 094, 2009 <https://2009.archiv.dog.org/abstracts/P094.html>
33. Quental H, Poças IM, Esteves C, Quintino W, Fortes CS. [Caracterização visual numa amostra infantil em idade pré-escolar e escolar - o estado da arte num rastreio.] XIV Congresso Nacional de Ortoptistas, 2013.   
<https://pdfs.semanticscholar.org/00b8/c3287f0cbde1d04ec7514b0d0a1d707ba4dd.pdf>
34. Lança C, Serra H, Prista J. Strabismus, visual acuity, and uncorrected refractive error in Portuguese children aged 6 to 11 years. *Strabismus.* 2014; 22(3):115-119.
35. Hendrickson K, Bleything W. The visual profile of Romanian children and adults assessed through vision screenings. *Optometry.* 2001; 72(6):388-396.
36. Mazepa GM. [Results of a thorough eye examination in kindergarten children of the city of Saratov]. *Oftalmol Zh.* 1967; 22(2):151-154.
37. Maïmulov VG. [State of visual functions of Leningrad preschool children]. *Oftalmol Zh.* 1971; 26(5):378-381.
38. Delgado Molina A, Zato Gomez de Liano MA. [Estereogramas y prevencion visual escolar.] *Arch Soc Esp Oftal.* 1991; 60:445-450.

39. Martínez J, Cañamares S, Saornil MA, Almaraz A, Pastor JC. Original papers: Prevalence of amblyogenic diseases in a preschool population sample of Valladolid, Spain. *Strabismus*. 1997; 5(2):73-80.
40. Nordlöw W. [Ögonen inom den förebyggande barnavården.] *Svenska Läk-tidn*. 1944; 41:1385-1395.
41. Nordlöw W. Squint—the frequency of onset at different ages, and the incidence of some associated defects in a Swedish population. *Acta Ophthalmol*. 1964; 42:1015–1037.
42. Köhler L, Stigmar G. Vision screening of four-year-old children. *Acta Paediatr Scand*. 1973; 62(1):17-27.
43. Lennerstrand G, Gallo JE. Prevalence of refractive errors and ocular motility disorders in 5- to 10-year-old Swedish children born prematurely or at full-term. *Acta Ophthalmol (Copenh)*. 1989; 67(6):717-718.
44. Rasmussen F, Thorén K, Caines E, Andersson J, Tynelius P. Suitability of the Lang II random dot stereotest for detecting manifest strabismus in 3-year-old children at child health centres in Sweden. *Acta Paediatr*. 2000; 89(7):824-829.
45. Kvarnström G, Jakobsson P, Lennerstrand G. Visual screening of Swedish children: an ophthalmological evaluation. *Acta Ophthalmol Scand*. 2001; 79(3):240-244.
46. Ohlsson J, Villarreal G, Sjöström A, Abrahamsson M, Sjöstrand J. Visual acuity, residual amblyopia and ocular pathology in a screened population of 12-13-year-old children in Sweden. *Acta Ophthalmol Scand*. 2001; 79(6):589-595.
47. Aring E, Grönlund MA, Andersson S, Hård AL, Ygge J, Hellström A. Strabismus and binocular functions in a sample of Swedish children aged 4-15 years. *Strabismus*. 2005; 13(2):55-61.
48. Holmström G, Rydberg A, Larsson E. Prevalence and development of strabismus in 10-year-old premature children: a population-based study. *J Pediatr Ophthalmol Strabismus*. 2006; 43(6):346-352.
49. Abdi S, Lennerstrand G, Pansell T, Rydberg A. Orthoptic findings and asthenopia in a population of Swedish schoolchildren aged 6 to 16 years. *Strabismus*. 2008; 16(2):47-55.
50. Voirol AF. [Untersuchungen ueber Refraktion, Visus, Farbensinn und Muskelgleichgewicht an den Augen von 939 Schulkindern.] *Zeitschr Augenheilk*. 1912; 28:95-110.
51. Franceschetti A, Franceschetti AT, Hudson-Shaw S. [Detection of eye disorders in children of pre-school age]. *Klin Monbl Augenheilkd*. 1966; 149(5):657-662.
52. Gansner J. [On the incidence of strabismic amblyopia. Statistical survey of the preschool children of an urban population]. *Ophthalmologica*. 1968; 155(3):234-244.
53. Worth CA. *Squint: Its Causes, Pathology, And Treatment*. 3<sup>rd</sup> Edition. 234 pages, 1906.
54. Tyser PA, Letchworth TW. A study in visual defects in young children. *Br Med J*. 1949; 2:1022-1023.
55. Sorsby A, Sheridan M, Leary GA, Benjamin B. Vision, visual acuity, and ocular refraction of young men: findings in a sample of 1,033 subjects. *Br Med J*. 1960; 1(5183):1394-1398.
56. Graham PA. Epidemiology of Strabismus. *Brit J Ophthalmol*. 1974; 58(3):224-231.
57. Bruce A, Hurst M, Abbott H, Harrison H. The incidence of refractive error and anomalies of binocular vision in infants. *Br Orthoptic J*. 1991; 48:32-35.
58. Stayte M, Reeves B, Wortham C. Ocular and vision defects in preschool children. *Brit J Ophthalmol*. 1993; 77(4):228-232.
59. Newman DK, Hitchcock A, McCarthy H, Keast-Butler J, Moore AT. Preschool vision screening: outcome of children referred to the hospital eye service. *Brit J Ophthalmol*. 1996; 80(12):1077-1082.
60. O'Connor AR, Stephenson TJ, Johnson A, Tobin MJ, Ratib S, Fielder AR. Strabismus in children of birth weight less than 1701 g. *Arch Ophthalmol*. 2002; 120(6):767-773.
61. Williams C, Northstone K, Howard M, Harvey I, Harrad RA, Sparrow JM. Prevalence and risk factors for common vision problems in children: data from the ALSPAC study. *Brit J Ophthalmol*. 2008; 92(7):959-964.

62. Hu VH, Starling A, Baynham SN, Wager H, Shun-Shin GA. Accuracy of referrals from an orthoptic vision screening program for 3- to 4-year-old preschool children. *J AAPOS*. 2012; 16(1):49-52.
63. Toufeeq A, Oram AJ. School-entry vision screening in the United Kingdom: practical aspects and outcomes. *Ophthalmic Epidemiol*. 2014; 21(4):210-216.
64. Bruce A, Santorelli G. Prevalence and risk factors of strabismus in a UK multi-ethnic birth cohort. *Strabismus*. 2016; 24(4):153-160.
65. Plotnikov D, Shah RL, Rodrigues JN, Cumberland PM, Rahi JS, Hysi PG, Atan D, Williams C, Guggenheim JA; UK Biobank Eye and Vision Consortium. A commonly occurring genetic variant within the NPLOC4-TSPAN10-PDE6G gene cluster is associated with the risk of strabismus. *Hum Genet*. 2019; 138(7):723-737.
66. Skeller E, Øster J. Eye symptoms in mongolism. *Acta Ophthalmol (Copenh)*. 1951; 29(2):149-161.
67. Oster J. Mongolism; a clinicogenealogical investigation comprising 526 mongols living on Seeland and neighbouring islands in Denmark. 1953. Copenhagen: Danish Science Press Ltd.
68. Haargaard B, Fledelius HC. Down's syndrome and early cataract. *Br J Ophthalmol*. 2006; 90(8):1024-1027.
69. Pearce FH, Rankine R, Ormond AW. Notes on twenty-eight cases of Mongolian imbeciles: with special reference to their ocular condition. *Br Med J*. 1910; 2(2586):186-190.
70. Ormond AW. Notes on the ophthalmic condition of forty-two Mongolian imbeciles. *Trans Am Ophthalmol Soc*. 1912; 32:69-76.
71. Brushfield T. Mongolism. *Brit J Child Dis*. 1924; 21:241-258.
72. Engler M. Mongolism (Peristatic Amentia). John Wright, Bristol, 1949. 215 pp. Caterham, UK.
73. Lowe RF. The eyes in mongolism. *Br J Ophthalmol*. 1949; 33(3):131-174.
74. Oladiwura D, Shweikh Y, Roberts C, Theodorou M. Nystagmus in Down Syndrome - a Retrospective Notes Review. *Br Ir Orthopt J*. 2022; 18(1):48-56.
75. Woodhouse JM, Pakeman VH, Cregg M, Saunders KJ, Parker M, Fraser WI, Sastry P, Lobo S. Refractive errors in young children with Down syndrome. *Optom Vis Sci*. 1997; 74(10):844-851.
76. Bromham NR, Woodhouse JM, Cregg M, Webb E, Fraser WI. Heart defects and ocular anomalies in children with Down's syndrome. *Br J Ophthalmol*. 2002; 86(12):1367-1368.
77. Cregg M, Woodhouse JM, Stewart RE, Pakeman VH, Bromham NR, Gunter HL, Trojanowska L, Parker M, Fraser WI. Development of refractive error and strabismus in children with Down syndrome. *Invest Ophthalmol Vis Sci*. 2003; 44(3):1023-1030.
78. Stewart RE, Woodhouse JM, Cregg M, Pakeman VH. Association between accommodative accuracy, hypermetropia, and strabismus in children with Down's syndrome. *Optom Vis Sci*. 2007; 84(2):149-155.
79. Vontobel W. Uber Linsen und Hornhautuntersuchungen an mongoloiden Idioten. *Arch Ophthalmol*. 1933; 130:325-338.
80. Gnad HD, Rett A. [Ocular signs in cases of Down's syndrome (author's translation)]. *Wien Klin Wochenschr*. 1979; 91(21):735-737.
81. Missiroli A, Vanni V. Sui segni oculari della sindrome di Down (mongolismo [Ocular signs in Down's syndrome (mongolism)]). *Boll Ocul*. 1970; 49(2):123-139. Italian.
82. Fimiani F, Iovine A, Carelli R, Pansini M, Sebastio G, Magli A. Incidence of ocular pathologies in Italian children with Down syndrome. *Eur J Ophthalmol*. 2007; 17(5):817-822.
83. Purpura G, Bacci GM, Bargagna S, Cioni G, Caputo R, Tinelli F. Visual assessment in Down syndrome: The relevance of early visual functions. *Early Hum Dev*. 2019; 131:21-28.
84. Elsahn, M. International Vision Screening: Results from Alexandria, Egypt. *Curr Ophthalmol Rep*. 2014; 2:137-141.
85. Abdelrahman A, Abdellah M, Alsamman A, Radwan G. The prevalence of strabismus in children at school age in Sohag City. *Egypt J Clin Ophthalmol*. 2020; 3(1):11-17.

86. Giorgis AT, Bejiga A. Prevalence of strabismus among pre-school children community in Butajira Town. *Ethiop J Health Dev.* 2001; 15(2):125-130.
87. Tegegne MM, Fekadu SA, Assem AS. Prevalence of Strabismus and Its Associated Factors Among School-Age Children Living in Bahir Dar City: A Community-Based Cross-Sectional Study. *Clin Optom (Auckl).* 2021; 13:103-112.
88. Onsomu EM. Strabismus as seen in children aged 3 to 5 years attending Nairobi City Council day nursery schools in Nairobi province, Kenya. Dissertation, 2003, University of Nairobi, College of Health Sciences [2678]
89. Mutie DM. Ocular morbidity in nursery school children in Kilungu Division, Makueni District. Dissertation Master of Medicine, Ophthalmology, University of Nairobi, Kenya, 2008.
90. Gordon YJ, Mokete M. Screening of pre-school and school children for ocular anomalies in Lesotho. *J Trop Med Hyg.* 1982; 85(4):135-137.
91. Auzemery A, Andriamanamihaja R, Boisier P. [A survey of the prevalence and causes of eye disorders in primary school children in Antananarivo]. *Sante.* 1995; 5(3):163-166.
92. Freedman J. Survey of ocular disease among the Nama people of South West Africa. *Brit J Ophthalmol.* 1973; 57(9):681-687.
93. Yassur Y, Yassur S, Zaifrani S, Sachs U, Ben-Sira I. Amblyopia among African pupils in Rwanda. *Brit J Ophthalmol.* 1972; 56(4):368-370.
94. Naidoo KS, Raghunandan A, Mashige KP, Govender P, Holden BA, Pokharel GP, Ellwein LB. Refractive error and visual impairment in African children in South Africa. *Invest Ophthalmol Vis Sci.* 2003; 44(9):3764-3770.
95. Zeidan Z, Hashim K, Muhit MA, Gilbert C. Prevalence and causes of childhood blindness in camps for displaced persons in Khartoum: results of a household survey. *East Mediterr Health J.* 2007; 13(3):580-585.
96. Taha AO, Ibrahim SM. Prevalence of manifest horizontal strabismus among basic school children in Khartoum City, Sudan. *Sudanese J Ophthalmol.* 2015; 7:53-57.
97. Alrasheed SH, Naidoo KS, Clarke-Farr PC. Prevalence of visual impairment and refractive error in school-aged children in South Darfur State of Sudan. *Afr Vision Eye Health.* 2016; 75(1):a355. doi: 10.4102/aveh.v75i1.355
98. Kingo AU, Ndawi BT. Prevalence and causes of low vision among schoolchildren in Kibaha District, Tanzania. *Tanzan J Health Res.* 2009; 11(3):111-115.
99. Pergens E. [Les yeux et les fonctions visuelles des Congolais.] *Janus.* 1898; 2:459-463.
100. Holm S. [Le strabisme concomitant chez les palénégrides au Gabon, Afrique Equatoriale Française. Contribution à la question de race et de strabisme.] *Acta Ophthalmol.* 1939; 17:367-387.
101. Kumah BD, Ebri A, Abdul-Kabir M, Ahmed AS, Koomson NY, Aikins S, Aikins A, Amedo A, Lartey S, Naidoo K. Refractive error and visual impairment in private school children in Ghana. *Optom Vis Sci.* 2013; 90(12):1456-1461.
102. Nartey ET, van Staden DB, Amedo AO. Prevalence of ocular anomalies among schoolchildren in Ashaiman, Ghana. *Optom Vis Sci.* 2016; 93(6):607-611.
103. Abdul-Kabir M, Abdul-Sadik A, Ansah DO and Ofosu-Koranteng L. Prevalence of anisometropia, strabismus and amblyopia among first year optometry students in Kwame Nkrumah University of Science and Technology, Ghana. *Mathews J Ophtalmol.* 2017; 2(2):018
104. Hertz J, Gombosh G, Avshalom A. Vision screening of students in Liberia. A preliminary report. *J Pediatr Ophthalmol Strabismus* 1964; 1(3):33-36.
105. Abiose A, Bhar IS, Allanson MA. The ocular health status of postprimary school children in Kaduna, Nigeria: report of a survey. *J Pediatr Ophthalmol Strabismus.* 1980; 17(5):337-340.
106. Baiyeroju-Agbeja AM, Owwoeye JFA. Strabismus in children in Ibadan. *Niger J Ophthalmol.* 1998; 6(1):31-33.
107. Abah ER, Oladigbolu KK, Samaila E, Gani-Ikilama A. Ocular disorders in children in Zaria children's school. *Niger J Clin Pract.* 2011; 14(4):473-476.

108. Ajaiyeoba AI, Isawumi MA, Adeoye AO, Oluleye TS. Prevalence and causes of blindness and visual impairment among school children in south-western Nigeria. *Int Ophthalmol.* 2005; 26(4-5):121-125.
109. Atamah AO. Frequency and pattern of eye diseases among prisoners in Benin City. (A survey of Oko prisons, Benin City.) Dissertation, Medical College of Nigeria, 2005.
110. Azonobi IR, Olatunji FO, Addo J. Prevalence and pattern of strabismus in Ilorin. *West Afr J Med.* 2009a; 28(4):253-256.
111. Ayanniyi AA, Mahmoud AO, Olatunji FO. Causes and prevalence of ocular morbidity among primary school children in Ilorin, Nigeria. *Niger J Clin Pract.* 2010; 13(3):248-253.
112. Akpe BA, Dawodu OA, Abadom EG. Prevalence and pattern of strabismus in primary school pupils in Benin City, Nigeria. *Nigerian J Ophthalmol.* 2014; 22:38-43
113. Ezinne NE, Mashige KP. Refractive error and visual impairment in primary school children in Onitsha, Anambra State, Nigeria. *Afr Vision Eye Health.* 2018; 77(1):a455.
114. Atuanya GN, Suzan OI. Visual Problems Affecting Reading and Learning Among Primary School Children in Benin City, Nigeria. *Optom Vis Perform.* 2024; 12(2):91-98.
115. Adio AO, Wajuihian SO. Ophthalmic manifestations of children with Down syndrome in Port Harcourt, Nigeria. *Clin Ophthalmol.* 2012; 6:1859-1864.
116. Abdiyeva Y. The level of prevalence and risk factors of strabismus among children and adolescents, depending on the type of settlements in the Ganja-Gazakh economic district (Azerbaijan). *Ophthalmol Reports.* 2021; 14(4):45-53.
117. Fotouhi A, Hashemi H, Khabazkhoob M, Mohammad K. The prevalence of refractive errors among schoolchildren in Dezfoul, Iran. *Br J Ophthalmol.* 2007; 91(3):287-292.
118. Jamali P, Fotouhi A, Hashemi H, Younesian M, Jafari A. Refractive errors and amblyopia in children entering school: Shahrood, Iran. *Optom Vis Sci.* 2009; 86(4):364-369.
119. Yekta A, Fotouhi A, Hashemi H, Dehghani C, Ostadimoghaddam H, Heravian J, Derakhshan A, Yekta R, Rezvan F, Behnia M, Khabazkhoob M. The prevalence of anisometropia, amblyopia and strabismus in schoolchildren of Shiraz, Iran. *Strabismus.* 2010; 18(3):104-110.
120. Faghihi M, Ostadi moghaddam H, Fatemi A, Heravian Shandiz J, Yekta A. Strabismus and amblyopia in schoolboys of Varamin, Iran, in 2010. *Iranian J Ophthalmol.* 2012; 24:32-38.
121. Kwak J, Movahedan J, Tadjvidi P, Aref P, Maumenee IH. Mendelian inheritance of strabismus in a rural community of Northern Iran. *Invest Ophthalmol Vis Sci.* 2011; 52(14):6359.
122. Faghihi M, Ostadi moghaddam H, Fatemi A, Heravian Shandiz J, Yekta A. Strabismus and amblyopia in schoolboys of Varamin, Iran, in 2010. *Iranian J Ophthalmol.* 2012; 24:32-38.
123. Yekta A, Hashemi H, Azizi E, Rezvan F, Ostadimoghaddam H, Derakhshan A, Azimi A, Khabazkhoob M, Maboudi AAK. The prevalence of amblyopia and strabismus among schoolchildren in Northeastern Iran, 2011. *Iran J Ophthalmol.* 2012; 24:3-10.
124. Hashemi H, Yekta A, Jafarzadehpur E, Ostadimoghaddam H, Eshrati B, Mohazzab-Torabi S, Khabazkhoob M, Soroush S. The prevalence of strabismus in 7-year-old schoolchildren in Iran. *Strabismus.* 2015; 23(1):1-7.
125. Rajavi Z, Sabbaghi H, Baghini AS, Yaseri M, Moein H, Akbarian S, Behradfar N, Hosseini S, Rabei HM, Sheibani K. Prevalence of amblyopia and refractive errors among primary school children. *J Ophthalmic Vis Res.* 2015; 10(4):408-416.
126. Yekta A, Hashemi H, Ostadimoghaddam H, Haghghi B, Shafiee H, Mehravaran S, Nabovati P, Asharlous A, Khabazkhoob M. Strabismus and near point of convergence and amblyopia in 4-6 year-old children. *Strabismus.* 2016; 24(3):113-119.
127. Hashemi H, Nabovati P, Yekta A, Ostadimoghaddam H, Behnia B, Khabazkhoob M. The prevalence of strabismus, heterophorias, and their associated factors in underserved rural areas of Iran. *Strabismus.* 2017; 25(2):60-66.
128. Hamidi A, Heravian Shandiz J, Jalalifar S, Boomi Quchan Atigh S, Darvishi A, Lashkardoost H. The Prevalence of Strabismus and Heterophoria in 3-6 Years Old Children in Bojnurd, Iran, in 2016-2017. *J Paramed Sci Rehabil.* 2020; 9(1):59-67. Persian

129. Hashemi H, Pakzad R, Nabovati P, Azad Shahraki F, Ostadimoghaddam H, Aghamirsalim M, Pakbin M, Yekta A, Khoshhal F, Khabazkhoob M. The prevalence of tropia, phoria and their types in a student population in Iran. *Strabismus*. 2020; 28(1):35-41.
130. Derakhshan A, Sabermoghaddam A, Abdollahian M, Ghanavati SZ, Shakeri MT, Alirezaei M, Zareei A, Bamdad S. The Strabismus Prevalence in a Random Sample of Iran's Northeastern Population. *Pak J Ophthalmol*. 2024; 40(1):34-39.
131. Halboos MT, Mohammed MH, Al Jenabi ZK, Hamad N. Determination of Refractive Error and Strabismus in Two Primary Schools. *J Opht Res Rev Rep*. 2024; 5(1):1-5.
132. Mukhaiser MH, Al-Khateeb HS, Mohammed IA. (2023). Prevalence of Lazy Eyes Among Primary School Students in Rural Areas of Baghdad City. *J Adv Sci Nanotechnol*. 2023; 2(1):204-214.
133. Neumann E, Eibschitz N, Hyams S, Friedman Z. Ophthalmic screening in child welfare clinics in Israel with particular reference to strabismus and amblyopia. *J Pediatr Ophthalmol Strabismus*. 1971; 8:257–260.
134. Friedman Z, Neumann E, Hyams SW, Peleg B. Ophthalmic screening of 38,000 children, age 1 to 2 1/2 years, in child welfare clinics. *J Pediatr Ophthalmol Strabismus*. 1980; 17(4):261-267.
135. Friedmann L, Biedner B, David R, Sachs U. Screening for refractive errors, strabismus and other ocular anomalies from ages 6 months to 3 years. *J Pediatr Ophthalmol Strabismus*. 1980; 17(5):315-317.
136. Maaita JF, Sunna LF, Al-Madani MV, Horrani SM. Eye diseases in children in Southern Jordan. *Saudi Med J*. 2003; 24(2):154-156.
137. Lithander J. Prevalence of amblyopia with anisometropia or strabismus among schoolchildren in the Sultanate of Oman. *Acta Ophthalmol Scand*. 1998; 76(6):658-662.
138. Labadi L, Shahin R, Eperjesi F, Al-Shanti Y, Shehadeh M, Taha I. Prevalence of Visual Disorders among Urban Palestinian Preschool Children. *Open Ophthalmol J*. 2022; 16(1): e187436412112241.
139. Badr I, Qureshi I. Ocular status of school children in the town of Al-Majma'ah, Central Province, Saudi Arabia. *Saudi Med J*. 1981; 2:221-224.
140. Abolfotouh MA, Badawi I, Faheem Y. Prevalence of amblyopia among schoolboys in Abha city, Asir Region, Saudi Arabia. *J Egypt Public Health Assoc*. 1994; 69(1-2):19-30.
141. Bardisi WM, Bin Sadiq BM. Vision screening of preschool children in Jeddah, Saudi Arabia. *Saudi Med J*. 2002; 23:445–449.
142. Gorham JP, Behshad S, Weil NC. Comparison of Two Photoscreeners in a Population of Syrian Refugee Children. *J Pediatr Ophthalmol Strabismus*. 2021; 58(6):396-400.
143. Turaçlı ME, Aktan SG, Dürük K. Ophthalmic screening of school children in Ankara. *Eur J Ophthalmol*. 1995; 5(3):181-186.
144. Aslan L, Aslankurt M, Aksoy A, Altun H. Preventable visual impairment in children with nonprofound intellectual disability. *Eur J Ophthalmol*. 2013; 23(6):870-875.
145. Caca I, Cingu AK, Sahin A, Ari S, Dursun ME, Dag U, Balsak S, Alakus F, Yavuz A, Palanci Y. Amblyopia and refractive errors among school-aged children with low socioeconomic status in southeastern Turkey. *J Pediatr Ophthalmol Strabismus*. 2013; 50(1):37-43.
146. Gursoy H, Basmak H, Yaz Y, Colak E. Vision screening in children entering school: Eskisehir, Turkey. *Ophthalmic Epidemiol*. 2013; 20(4):232-238.
147. Çelikay O, Çalışkan S, Acar M, Biçer T, Doğan AS, Kabataş N, Arslan N, Köşker M, Gürdal C. [The results of an eye health screening in a primary school children.] *Türkiye Klinikleri J Ophthalmol*. 2016; 25.10.5336/ophthal.2015-48981.
148. McLaren DS. The refraction of Indian school children: a comparison of data from East Africa and India. *Br J Ophthalmol*. 1961; 45(9):604-613.
149. Agarwal LP, Prakash P, Mahur A, Pathak MM. Visual defects in school children. *Orient Arch Ophthal*. 1966; 4:1-8.

150. Gupta M, Gupta Y. A survey on refractive error and strabismus among children in a school at Aligarh. *Indian J Public Health*. 2000; 44(3):90-93.
151. Murthy GVS, Gupta SK, Ellwein LB, Muñoz SR, Pokharel GP, Sanga L, Bachani D. Refractive error in children in an urban population in New Delhi. *Invest Ophthalmol Vis Sci*. 2002; 43(3):623-631.
152. Bedi R, Bedi DK, Dudule CN, Nizamuddin, Keswani M, Saxena P. 2016. Prevalence of ocular morbidities among school children: a comparative study across social categories in Ajmer City. *Natl J Commun Med*. 2016; 7(3):184-188.
153. Mohan A, Bisht A, Sharma VK, Jamil Z. Epidemiology of ocular morbidity among school-going children. *All India Ophthalmol Soc Proc*. 2017; FP1242.
154. Awan AA, Aftab M, Arif S. Refractive error and squint in primary school children. *J Ayub Med Coll Abbotabad Pak*. 1995; 7(2):26-27.
155. Shaikh SP, Aziz TM. Pattern of eye diseases in children of 5-15 years at Bazzertaline area (South Karachi) Pakistan. *J Coll Physicians Surg Pak*. 2005; 15(5):291-294. Awan HR, Ihsan T. Prevalence of visual impairment and eye diseases in Afghan refugees in Pakistan. *E Mediterr Health J*. 1998; 4(3):560-566.
156. Awan HR, Ihsan T. Prevalence of visual impairment and eye diseases in Afghan refugees in Pakistan. *E Mediterr Health J*. 1998; 4(3):560-566.
157. Gupta PK, Caculo DU. The attitude towards strabismus and barriers for its treatment in parents from rural and urban areas. *Indian J Clin Exp Ophthalmol* 2021;7(1):54-61.
158. Qayyum S. Ocular disorders in children with Down's syndrome. *J Surg Pakistan Int*. 2006;11(1):31-33.
159. Khan, M. I., Ahmad, S., Anjum Nadeem, S. H., & Zaidi, S. R. (2016). Anomalies of Refraction, Accommodation and Binocular Single Vision in Down Syndrome. *Asian J Allied Health Sci*. (AJAHS) 2016; 1(1):11-16.
160. Ateeq A, Nadeem F. Frequency of Strabismus with Down Syndrome. *Ophthalmol Pakistan*. 2023;13(4):70-73.
161. Asaduzzaman M. Pattern of Ocular Morbidity among Children Referred Ophthalmology Dept. at Mugda Medical College Hospital, Mugda, Dhaka, Bangladesh. *J Med Sci*. 2024; 4(3):66-89.
162. Kuruvilla J, Srinivasa Rao P N. Ocular morbidity in school children in rural coastal area of Karnataka. *Indian J Ophthalmol*. 1978; 26(2):9-12.
163. Datta A, Choudhury N, Kundu K. An epidemiological study of ocular condition among primary school children of Calcutta Corporation. *Indian J Ophthalmol*. 1983; 31(5):505-510.
164. Reddy SC. Ocular morbidity and colour blindness among school children in Kakinada. *The Antiseptic*. 1987; 84(5):611-616.
165. Kalikivayi V, Naduvilath TJ, Bansal AK, Dandona L. Visual impairment in school children in Southern India. *Indian J Ophthalmol*. 1997; 45:129-134.
166. Dandona R, Dandona L, Srinivas M, Sahare P, Narsaiah S, Muñoz SR, Pokharel GP, Ellwein LB. Refractive error in children in a rural population in India. *Invest Ophthalmol Vis Sci*. 2002; 43(3):615-622.
167. Singh H. Pattern of ocular morbidity in school children in central India. *Natl J Community Med*. 2011; 2(3):429-431.
168. Kemmanu V, Hegde K, Giliyar SK, Shetty BK, Kumaramanickavel G, McCarty CA. Prevalence of Childhood Blindness and Ocular Morbidity in a Rural Pediatric Population in Southern India: The Pavagada Pediatric Eye Disease Study-1. *Ophthalmic Epidemiol*. 2016; 23(3):185-192.
169. Akarkar SO, Naik PG, Cacodcar JA. Prevalence and distribution of ocular morbidities among primary school children in Goa. *J Clin Ophthalmol Res* 2019; 7:61-64.
170. Saxena A, Nema N, Deshpande A. Prevalence of refractive errors in school-going female children of a rural area of Madhya Pradesh, India. *J Clin Ophthalmol Res*. 2019; 7(2):45-49.
171. Agrawal D, Sahu A, Agrawal D. Prevalence of ocular morbidities among school children in Raipur district, India. *Indian J Ophthalmol*. 2020; 68(2):340-344.

172. Atiya A, Hussaindeen JR, Kasturirangan S, Ramasubramanian S, Swathi K, Swaminathan M. Frequency of undetected binocular vision anomalies among ophthalmology trainees. *J Optom.* 2020; 13(3):185-190.
173. Liang YS, Lai IC, Loke TY, Chen TT. [Preliminary report of ocular examination in school children.] *Acta Soc Ophthalmol Sin.* 1984; 23:1-7.
174. Wang YC, Lee RF, Wang MW, Jeng ST, Lin SA. [Report of ocular examination of primary school children in south Taiwan.] *Acta Soc Ophthalmol Sin.* 1989; 28(1):29-33.
175. Ji G. [An investigation of 4,125 cases of Kazak childhood strabismus and amblyopia]. *Yan Ke Xue Bao.* 1994; 10(4):193-196.
176. See LC, Song HS, Ku WC, Lee JS, Liang YS, Shieh WB. Neglect of childhood strabismus: Keelung Ann-Lo Community ocular survey 1993-1995. *Changgeng Yi Xue Za Zhi.* 1996; 19(3):217-224.
177. He MG, Zeng J, Liu Y, Xu J, Pokharel GP, Ellwein LB. Refractive error and visual impairment in urban children in Southern China. *Invest Ophthalmol Vis Sci.* 2004; 45(3):793-799.
178. He MG, Huang W, Zheng Y, Huang L, Ellwein LB. Refractive error and visual impairment in school children in rural southern China. *Ophthalmology.* 2007; 114(2):374-382.
179. Lai YH, Hsu HT, Wang HZ, Chang SJ, Wu WC. The visual status of children ages 3 to 6 years in the vision screening program in Taiwan. *J AAPOS.* 2009; 13(1):58-62.
180. Fan DSP, Lai C, Lau HH, Cheung EY, Lam DS. Change in vision disorders among Hong Kong preschoolers in 10 years. *Clin Exp Ophthalmol.* 2011; 39(5):398-403.
181. Jin H, Yi JL, Xie H, Xiao F, Wang WJ, Shu XM, Xu YL, Chen SL, Ye WX. [A study on visual development among preschool children]. *Zhonghua Yan Ke Za Zhi. (Chin J Ophthalmol)* 2011; 47(12):1102-1106.
182. Pi LH, Chen L, Liu Q, Ke N, Fang J, Zhang S, Xiao J, Ye WJ, Xiong Y, Shi H, Zhou XY, Yin ZQ. Prevalence of eye diseases and causes of visual impairment in school-aged children in Western China. *J Epidemiol.* 2012; 22(1):37-44.
183. Lin S, Huang Y, Ma D, Qiu K, Chen B, Li L, Zhang M. [A cross-sectional study of strabismus prevalence in urban and rural primary and secondary school students in Shantou City.] *Chin J Strabismus Pediatr Ophthalmol.* 2013; 21(3):25-33.
184. Fu J, Li SM, Liu LR, Li JL, Li SY, Zhu BD, Li H, Yang Z, Li L, Wang NL; Anyang Childhood Eye Study Group. Prevalence of amblyopia and strabismus in a population of 7th-grade junior high school students in Central China: The Anyang Childhood Eye Study (ACES). *Ophthalmic Epidemiol.* 2014; 21(3):197-203.
185. Zhu H, Yu JJ, Yu RB, Ding H, Bai J, Chen J, Liu H. Association between childhood strabismus and refractive error in Chinese preschool children. *PLoS One.* 2015; 10(3):e0120720.
186. Chen X, Fu Z, Yu J, Ding H, Bai J, Chen J, Gong Y, Zhu H, Yu R, Liu H. Prevalence of amblyopia and strabismus in Eastern China: results from screening of preschool children aged 36-72 months. *Brit J Ophthalmol.* 2016; 100(4):515-519.
187. Pan CW, Chen X, Zhu H, Fu Z, Zhong H, Li J, Huang D, Liu H. School-based assessment of amblyopia and strabismus among multiethnic children in rural China. *Sci Rep.* 2017; 7(1):13410.
188. Zhu H, Pan C, Sun Q, Huang D, Fu Z, Wang J, Chen X, Wang Z, Liu H. Prevalence of amblyopia and strabismus in Hani school children in rural southwest China: a cross-sectional study. *BMJ Open.* 2019; 9(2):e025441.
189. Chen D, Li R, Li X, Huang D, Wang Y, Zhao X, Zhang X, Sun Q, Hao Q, Tong H, Yao X, Fan W, Lu W, Dang J, Zhu H, Liu H. Prevalence, incidence and risk factors of strabismus in a Chinese population-based cohort of preschool children: the Nanjing Eye Study. *Br J Ophthalmol.* 2021; 105(9):1203-1210.
190. Wang Y, Zhao A, Zhang X, Huang D, Zhu H, Sun Q, Yu J, Chen J, Zhao X, Li R, Han S, Dong W, Ma F, Chen X, Liu H. Prevalence of strabismus among preschool children in eastern China and comparison at a 5-year interval: a population-based cross-sectional study. *BMJ Open.* 2021; 11(10):e055112.

191. Lu P, Chen X, Zhang W, Chen S, Shu L. Prevalence of ocular disease in Tibetan primary school children. *Can J Ophthalmol*. 2008; 43(1):95-99.
192. He H, Fu J, Meng Z, Chen W, Li L, Zhao X. Prevalence and associated risk factors for childhood strabismus in Lhasa, Tibet, China: a cross-sectional, school-based study. *BMC Ophthalmol*. 2020; 20(1):463.
193. Zhang XJ, Lau YH, Wang YM, Kam KW, Ip P, Yip WW, Ko ST, Young AL, Tham CC, Pang CP, Chen LJ, Yam JC. Prevalence of strabismus and its risk factors among school aged children: The Hong Kong Children Eye Study. *Sci Rep*. 2021; 11(1):13820.
194. Nakagawa J, Suzuki S. [The incidence of strabismus in schoolchildren.] *J Sapporo City Gen Hosp*. 1954; 36:60-65.
195. Majima A, Nakajima A, Ichikawa H, Watanabe M. Prevalence of ocular anomalies among school children. *Am J Ophthalmol*. 1960; 50:139-146.
196. Nakajima A, Yoshimoto T, Ito N, Kimura T, Majima A, Awaya S. [Distribution of eye diseases among school children.] *Rinsho Ganka (Jpn J Clin Ophthalmol)*. 1960; 14:1762–1769.
197. Harada M, Yamamoto H. [Strabismus and amblyopia mass screening of preschool children.] *Ganrin*. 1961; 55(4): 374-377.
198. Yazawa K. [Ocular examination on 10,000 school children.] *Rinsho Ganka (Jpn J Clin Ophthalmol)*. 1973; 27:557–569.
199. Inatomi M, Futenma M, Hayashi M, Shimojima Y, Kawamura M, Okazaki H, Kinoshita K. [Natural course of uncorrected visual acuity and refraction among school children.] *Jap J Clin Ophthal*. (Rinsho Ganka) 1976; 30:1387-1397.
200. Maruo T, Kubota N, Arimoto H. [The results of examinations for strabismus and amblyopia in elementary and secondary school pupils.] *Ganka Rinsho Iho (Jpn Rev Clin Ophthalmol)*. 1977; 71:712–714.
201. Matsuo T, Matsuo C. The prevalence of strabismus and amblyopia in Japanese elementary school children. *Ophthalmic Epidemiol*. 2005; 12(1):31-36.
202. Matsuo T, Matsuo C. Comparison of prevalence rates of strabismus and amblyopia in Japanese elementary school children between the years 2003 and 2005. *Acta Med Okayama*. 2007; 61(6):329-334.
203. Matsuo T, Matsuo C, Matsuoka H, Kio K. Detection of strabismus and amblyopia at 1.5- and 3-year-old children by preschool vision-screening program in Japan. *Acta Med Okayama*. 2007; 61:9–16.
204. Goseki T, Ishikawa H. The prevalence and types of strabismus, and average of stereopsis in Japanese adults. *Jpn J Ophthalmol*. 2017; 61(3):280-285.
205. Satou T, Takahashi Y, Ito M, Mochizuki H, Niida T. Evaluation of visual function in preschool-age children using a vision screening protocol. *Clin Ophthalmol*. 2018; 12:339-344.
206. Yu YS, Kim SM, Kwon JY, Kim BC, Oh S, Rho YB, Lee WR. [Preschool vision screening in Korea: Preliminary study.] *J Korean Ophthalmol Soc*. 1991; 32(12):1092-1096.
207. Rah SH, Jun HS, Kim SH. [An epidemiological survey of strabismus among school-children in Korea.] *J Korean Ophthalmol Soc*. 1997; 38(12):2195-2199.
208. Yoon KC, Mun GH, Kim SD, Kim SH, Kim CY, Park KH, Park YJ, Baek SH, Song SJ, Shin JP, Yang SW, Yu SY, Lee JS, Lim KH, Park HJ, Pyo EY, Yang JE, Kim YT, Oh KW, Kang SW. Prevalence of eye diseases in South Korea: data from the Korea National Health and Nutrition Examination Survey 2008-2009. *Korean J Ophthalmol*. 2011; 25(6):421-433.
209. Lee JF, Kim CZ, Nam KY, Lee SU, Lee SJ. [An epidemiological survey of strabismus and nystagmus in South Korea: KNHANES V.] *J Korean Ophthalmol Soc*. 2017; 58(11):1260-1268.
210. Han KE, Baek SH, Kim SH, Lim KH; Epidemiologic Survey Committee of the Korean Ophthalmological Society. Prevalence and risk factors of strabismus in children and adolescents in South Korea: Korea National Health and Nutrition Examination Survey, 2008-2011. *PLoS One*. 2018; 13(2):e0191857.

211. Casson RJ, Kahawita S, Kong A, Muecke J, Sisaleumsak S, Visonnavong V. Exceptionally low prevalence of refractive error and visual impairment in schoolchildren from Lao People's Democratic Republic. *Ophthalmology*. 2012; 119(10):2021-2027.
212. Teoh GH, Yow CS. Prevalence of squints and visual defects in Malaysian primary one school children. *Med J Malaysia*. 1982; 37(4):336-337.
213. Goh PP, Abqariyah Y, Pokharel GP, Ellwein LB. Refractive error and visual impairment in school-age children in Gombak District, Malaysia. *Ophthalmology*. 2005; 112(4):678-685.
214. Premseenthil M, Manju R, Thanaraj A, Rahman SA, Kah TA. The screening of visual impairment among preschool children in an urban population in Malaysia; the Kuching pediatric eye study: a cross sectional study. *BMC Ophthalmol*. 2013; 13:16.
215. Chew FLM, Thavaratnam LK, Shukor INC, Ramasamy S, Rahmat J, Reidpath DD, Allotey P, Alagaratnam J. Visual impairment and amblyopia in Malaysian pre-school children - The SEGPAEDS study. *Med J Malaysia*. 2018; 73(1):25-30.
216. Nepal BP, Koirala S, Adhikary S, Sharma AK. Ocular morbidity in schoolchildren in Kathmandu. *Brit J Ophthalmol*. 2003; 87(5):531-534.
217. Shrestha RK, Joshi MR, Ghising R, Pradhan P, Shakya S, Rizyal A. Ocular morbidity among children studying in private schools of Kathmandu valley: A prospective cross sectional study. *Nepal Med Coll J*. 2006; 8(1):43-46.
218. Sherpa D, Panta CR, Joshi N. Ocular morbidity among primary school children of Dhulikhel, Nepal. *Nepal J Ophthalmol*. 2011; 3(2):172-176.
219. Shrestha RK, Joshi MR, Ghising R, Rizyal A. Ocular morbidity among children attending government and private schools of Kathmandu valley. *J Nepal Med Assoc. (JNMA)* 2011; 51(184):182-188.
220. Pant M, Shrestha GS, Joshi ND. Ocular morbidity among street children in Kathmandu Valley. *Ophthalmic Epidemiol*. 2014; 21(6):356-361.
221. Sherpa D. Ocular morbidity among primary school children. *J Chitwan Med Coll*. 2014; 4(2):32-34.
222. Chia A, Dirani M, Chan YH, Gazzard G, Au Eong KG, Selvaraj P, Ling Y, Quah BL, Young TL, Mitchell P, Varma R, Wong TY, Saw SM. Prevalence of amblyopia and strabismus in young Singaporean Chinese children. *Invest Ophthalmol Vis Sci*. 2010; 51:3411-3417.
223. Konyama K. Refractive state and ocular deviation of the school children in Thailand. *Orient Arch Ophthal*. 1972; 10:229-237.
224. Mahachaiyakul A, Sinpornchai N, Kunavisarut S. [The study of refractive state and strabismus prevalence in school children.] *Thai J Ophthalmol*. 1997; 11:1-8.
225. Tananuvat N, Manassakorn A, Worapong A, Kupat J, Chuwuttayakorn J, Wattananikorn S. Vision screening in schoolchildren: two years results. *J Med Assoc Thai*. 2004; 87(6):679-684.
226. Jenchitr W, Pongprayoon C, Vongkittiruk, Imsuwan Y. [Ocular health in private school girls in Sukhumvit area of Bangkok.] *J Health Sci*. 2012; 21(3):489-498.
227. Paudel P, Ramson P, Naduvilath T, Wilson D, Phuong HT, Ho SM, Giap NV. Prevalence of vision impairment and refractive error in school children in Ba Ria - Vung Tau province, Vietnam. *Clin Exp Ophthalmol*. 2014; 42(3):217-226.
228. Mann I. Culture, Race, Climate and Eye Disease. Springfield, Illinois, Charles C. Thomas, 1966. 580 pages.
229. Mann I, Rountree P. Geographic ophthalmology. A report on a recent survey of Australian aboriginals. *Am J Ophthalmol*. 1968; 66(6):1020-1034.
230. Royal Australian College of Ophthalmologists. The National Trachoma and Eye Health Program. 217 pp, Sydney, 1980.
231. Hopkins S, Sampson GP, Hendicott PL, Wood JM. A Visual Profile of Queensland Indigenous Children. *Optom Vis Sci*. 2016; 93(3):251-258.

232. Ward BA. Ophthalmic survey of Fiji with special reference to the problem of Trachoma, February-November 1955. In: Annual Report of the Medical Department for the year 1955 and File A48/201/1. Suva: National Archives of Fiji.
233. Mann I, Potter D. Geographic ophthalmology. A preliminary study of the Maoris of New Zealand. *Am J Ophthalmol.* 1969; 67(3):358-369.
234. Mann I, Loschdörfer J. Ophthalmic survey of the Territories of Papua and New Guinea, 1955. Public Health Department publication, Port Moresby, 1956, 53 p.
235. Elliott R. An ophthalmic survey of the Tokelau Islands. *Trans Ophthalmol Soc NZ.* 1965; 17:25-35.
236. Verlee DL. Ophthalmic survey in the Solomon Islands. *Am J Ophthalmol.* 1968; 66(2):304-319.
237. Brown S, Jones D. A survey of the incidence of defective vision and strabismus in kindergarten age children – Sydney, 1976. *Aust Orthopt J.* 1976; 15:24-28.
238. Macfarlane DJ, Fitzgerald WJ, Stark DJ. The prevalence of ocular disorders in 1000 Queensland primary schoolchildren. *Aust N Z J Ophthalmol.* 1987; 15(3):161-174.
239. Robaei D, Rose KA, Kifley A, Cosstick M, Ip JM, Mitchell P. Factors associated with childhood strabismus: findings from a population-based study. *Ophthalmology.* 2006a; 113(7):1146-1153.
240. Robaei D, Kifley A, Mitchell P. Factors associated with a previous diagnosis of strabismus in a population-based sample of 12-year-old Australian children. *Am J Ophthalmol.* 2006b; 142(6):1085-1088.
241. Sharbini SH. Prevalence of strabismus & associated risk factors: The Sydney Childhood Eye Studies. Dissertation, University of Sydney, Faculty of Health Sciences (Orthoptic), 2015, 290 pp.
242. Simpson A, Kirkland C, Silva PA. Vision and eye problems in seven year olds: a report from the Dunedin Multidisciplinary Health and Development Research Unit. *NZ Med J.* 1984; 97:445-449.
243. Leone JF, Cornell E, Morgan IG, Mitchell P, Kifley A, Wang JJ, Rose KA. Prevalence of heterophoria and associations with refractive error, heterotropia and ethnicity in Australian school children. *Br J Ophthalmol.* 2010; 94(5):542-546.
244. Pai ASI. Vision and refraction in Australian preschool children: Measures, prevalence, and associated factors. PhD Thesis, University of Sydney, 2013.
245. Anstice N, Spink J, Abdul-Rahman A. Review of preschool vision screening referrals in South Auckland, New Zealand. *Clin Exp Optom.* 2012; 95(4):442-448.
246. Fanning GS. Vision in children with Down's syndrome. *Aust J Optom.* 1971; 54(3):74-82.
247. Kornder LD, Nursey JN, Pratt-Johnson JA, Beattie A. Detection of manifest strabismus in young children. I. A prospective study. *Am J Ophthalmol.* 1974a; 77(2):207-210.
248. Kornder LD, Nursey JN, Pratt-Johnson JA, Beattie A. Detection of manifest strabismus in young children. 2. A retrospective study. *Am J Ophthalmol.* 1974b; 77(2):211-214.
249. Johnson GJ, Green JS, Paterson GD, Perkins ES. Survey of ophthalmic conditions in a Labrador community: II. Ocular disease. *Can J Ophthalmol.* 1984; 19(5):224-233.
250. Woodruff ME. Vision and refractive status among grade 1 children of the Province of New Brunswick. *Am J Optom Physiol Opt.* 1986; 63(7):545-552.
251. Robinson B, Bobier WR, Martin E, Bryant L. Measurement of the validity of a preschool vision screening program. *Am J Public Health.* 1999; 89(2):193-198.
252. Collins SD. Strabismus and defective color sense among school children. *Pub Health Rep. (Washington)* 1925; 40:1515-1523.
253. Knapp FN. The economic importance of squint in children and its effect in after years. *Minnesota Med.* 1931; 14(4):324-329.
254. Downing AH. Ocular defects in sixty thousand selectees. *Arch Ophthalmol.* 1945; 33(2):137-143.

255. Blum HL, Peters HB, Bettman JW. Vision Screening for Elementary Schools. The Orinda Study. Univ of California Press, Berkeley and Los Angeles, 1959, 146 pages.
256. Roberts J. Eye examination findings among children, United States. Vital and health statistics: Series 11-No. 115, DHEW publication No. (HSM) 72-1057. Health Services and Mental Health Administration. Washington. U.S. Government Printing Office, June 1972.
257. Roberts J. Eye examination findings among youths aged 12-17 years, United States. Vital and health statistics: Series 11-No. 155, DHEW publication no. (HRA) 76-1637. Health Resources Administration. Washington. U.S. Government Printing Office, Nov. 1975.
258. Roberts J, Rowland M. Refractive status and motility defects of persons 4-74 years, United States 1971-1972. Vital and health statistics: series 11, DHEW publication no. (PHS) 78-1654. Hyattsville, MD: National Center for Health Statistics, 1978.
259. Chew E, Remaley NA, Tamboli A, Zhao J, Podgor MJ, Klebanoff M. Risk factors for esotropia and exotropia. *Arch Ophthalmol*. 1994; 112(10):1349-1355.
260. Friedman DS, Repka MX, Katz J, Giordano L, Ibrionke J, Hawse P, Tielsch JM. Prevalence of amblyopia and strabismus in white and African American children aged 6 through 71 months: The Baltimore Pediatric Eye Disease Study. *Ophthalmology*. 2009; 116:2128-2134.
261. Cotter SA, Varma R, Tarczy-Hornoch K, McKean-Cowdin R, Lin J, Wen G, Wei J, Borchert M, Azen SP, Torres M, Tielsch JM, Friedman DS, Repka MX, Katz J, Ibrionke J, Giordano L; Joint Writing Committee for the Multi-Ethnic Pediatric Eye Disease Study and the Baltimore Pediatric Eye Disease Study Groups. Risk factors associated with childhood strabismus: the multi-ethnic pediatric eye disease and Baltimore pediatric eye disease studies. *Ophthalmology*. 2011; 118(11):2251-2261.
262. McKean-Cowdin R, Cotter SA, Tarczy-Hornoch K, Wen G, Kim J, Borchert M, Varma R, & Multi-Ethnic Pediatric Eye Disease Study Group: Prevalence of amblyopia or strabismus in Asian and non-Hispanic white preschool children: multi-ethnic pediatric eye disease study. *Ophthalmology*. 2013; 120:2117-2124.
263. Wick B, Crane S. A vision profile of American Indian children. *Am J Optom Physiol Opt*. 1976; 53(1):34-40.
264. Adler-Grinberg D. Need for eye and vision care in an underserved population: refractive errors and other ocular anomalies in the Sioux. *Am J Optom Physiol Opt*. 1986; 63(7):553-558.
265. Maples WC, Atchley J, Ashby W, Ficklin T. An epidemiological study of the ocular and visual profiles of Oklahoma Cherokees and Minnesota Chippewas. *J Am Optom Assoc*. 1990; 61(10):784-788.
266. Lang D, Leman R, Arnold AW, Arnold RW. Validated portable pediatric vision screening in the Alaska Bush. A VIPS-like study in the Koyukon. *Alaska Med*. 2007; 49(1):2-15.
267. Garvey KA, Dobson V, Messer DH, Miller JM, Harvey EM. Prevalence of strabismus among preschool, kindergarten, and first-grade Tohono O'odham children. *Optometry*. 2010; 81(4):194-199.
268. Chiarelli CA, Chris AP. Visual status of First Nations children: The Sagamok First Nation Vision Care Project. *Can J Optom*. 2013; 75(4):39-46.
269. Woodruff ME, Samek MJ. The refractive status of Belcher Island Eskimos. *Can J Public Health*. 1976; 67(4):314-320.
270. Friendly DS. Preschool visual acuity screening tests. *Trans Am Ophthalmol Soc*. 1978; 76:383-480.
271. Preslan MW, Novak A. Baltimore Vision Screening Project. *Ophthalmology*. 1996; 103(1):105-109.
272. Preslan MW, Novak A. Baltimore Vision Screening Project. Phase 2. *Ophthalmology*. 1998; 105(1):150-153.
273. Multi-ethnic Pediatric Eye Disease Study Group. Prevalence of amblyopia and strabismus in African American and Hispanic children ages 6 to 72 months: the Multi-ethnic Pediatric Eye Disease Study. *Ophthalmology*. 2008; 115:1229-1236.

274. Choi TB, Lee DA, Oelrich FO, Amponash D, Bateman JB, Christensen RE. A retrospective study of eye disease among first grade children in Los Angeles. *J Am Optom Assoc.* 1995; 66(8):484-488.
275. Levinson A, Friedman A, Stamps F. Variability of mongolism. *Pediatrics.* 1955;16(1):43-54.
276. Shapiro MB, France TD. The ocular features of Down's syndrome. *Am J Ophthalmol.* 1985; 99(6):659-663.
277. Roizen NJ, Mets MB, Blondis TA. Ophthalmic disorders in children with Down syndrome. *Dev Med Child Neurol.* 1994; 36(7):594-600.
278. Averbuch-Heller L, Dell'Osso LF, Jacobs JB, Remler BF. Latent and congenital nystagmus in Down syndrome. *J Neuroophthalmol.* 1999; 19(3):166-172.
279. Cullen JF, Butler HG. Mongolism (Down's syndrome) and keratokonus. *Br J Ophthalmol.* 1963; 47(6):321-330.
280. Jaeger EA. Ocular findings in Down's syndrome. *Trans Am Ophthalmol Soc.* 1980; 78:808-845.
281. Warshowsky J. A vision screening of a Down's syndrome population. *J Am Optom Assoc.* 1981; 52(7):605-607.
282. Krinsky-McHale SJ, Silverman W, Gordon J, Devenny DA, Oley N, Abramov I. Vision deficits in adults with Down syndrome. *J Appl Res Intellect Disabil.* 2014; 27(3):247-263.
283. Urrets-Zavalía A, Solares-Zamora J, Olmos HR. Anthropological studies on the nature of cyclovertical squint. *Br J Ophthalmol.* 1961; 45(9):578-596.
284. Belfort Mattos R. [Estudo oftalmológico dos Índios do Meio Xingu.] *Arq Bras Oftalmol.* 1970; 33(20):33-43.
285. Germano RAS, Kawai RM, de Souza BL, Germano FAS, Germano CS, Germano JE. Frequency of ocular conditions in native Brazilians from Avai City, Sao Paulo state. *Rev Bras Oftalmol.* 2017; 76(5):227-231.
286. Couto Jr AS, Pinto GR, de Oliveira DA, Holzmeister D, Portes ALF, Neurauter R, Portes AJF. [Prevalence of the ametropias and eye diseases in preschool and school children of Alto da Boa Vista favelas, Rio de Janeiro, Brazil]. *Rev Bras Oftalmol.* 2007; 66(5):304-308.
287. Couto Jr AS, Jardim JL, de Oliveira DA, Gobetti TC, Portes AJF, Neurauter R. [Eye diseases in preschool and school children in the city of Duque de Caxias, Rio de Janeiro, Brazil]. *Rev Bras Oftalmol.* 2010; 69(1):7-11.
288. Maul E, Barroso S, Munoz SR, Sperduto RD, Ellwein LB. Refractive error study in children: results from La Florida, Chile. *Am J Ophthalmol.* 2000; 129(4):445-454.
289. Vasquez SC, Lopez AMV. [Análisis de la situación de salud visual y ocular en los niños y niñas entre 3 y 18 años pertenecientes al proyecto de educación en convivencia y ciudadanía pecc en la clínica de optometría de la universidad de la sale.] Thesis, Univ de la Salle, Bogota, 2014
290. Márquez Galvis MM, Cáceres Díaz MC. [Visual and ocular health profile of children from two child development centers in Pereira, Colombia.] *Cienc Tecnol Salud Vis Ocul.* 2017; 15(2):61-70.
291. Molinari A, Heede S, Virgili G, Angi M. [Trastornos de la motilidad ocular en una población de niños escolares de la Sierra Ecuatoriana / Ocular motility disorders in a population of school children in the Sierra Ecuatoriana.] *Arch Chil Oftalmol.* 2005; 63(2):359-362.
292. Juárez-Muñoz IE, Rodríguez-Godoy ME, Guadarrama-Sotelo ME, Guerrero-Anaya M, Mejía-Arangúre JM, Sciandra-Rico M. [Incidence of common ophthalmological disorders in preschool children in Mexico City]. *Salud Publica Mex.* 1996; 38(3):212-216.
293. Ohlsson J, Villarreal G, Sjöström A, Cavazos H, Abrahamsson M, Sjöstrand J. Visual acuity, amblyopia, and ocular pathology in 12- to 13-year-old children in Northern Mexico. *J AAPOS.* 2003; 7(1):47-53.

294. Costa MN, Jose NK, Filho NM, Rangel FF, Rueda G, Pereira VL, Favero M. [Estudo da incidência de ambliopia, estrabismo e anisometropia em pré-escolares.] *Arq Bras Oftal* 1979; 42(6):249-252.
295. Schimiti RB, Costa VP, Gregui MJF, Kara-José N, Temporini ER. Prevalence of refractive errors and ocular disorders in preschool and schoolchildren of Ibitiporã-PR, Brazil (1989 to 1996). *Arq Bras Oftalmol*. 2001; 64(5):379-384.
296. Beer SMC, Scarpi MJ, Minello A. [Ocular findings in children between 0 and 6 years of age, residing in the city of Sao Caetano do Sul, SP]. *Arq Bras Oftalmol*. 2003; 66(6):839-845.
297. Garcia CA, de Sousa AB, Mendonca MB, Andrade LL, Orefice F. Prevalence of strabismus among students in Natal/RN – Brazil. *Arq Bras Oftalmol*. 2004; 67(5):791-794.
298. De Sousa RLF, Funayama BS, Cataneo L, Padovani CR, Schellini SA. [Comparison between visual acuity and photoscreening used like visual screening methods for scholar aged children.] *Rev Bras Oftalmol*. 2012; 71(6):358-363.
299. Shimauti AT, Pesci LT, Sousa RL, Padovani CR, Schellini SA. [Strabismus: Detection in a population-based sample and associated demographic factors.] *Arq Bras Oftalmol*. 2012; 75(2):92–96.
300. Schaal LF, Schellini SA, Pesci LT, Galindo A, Padovani CR, Corrente JE. The prevalence of strabismus and associated risk factors in a Southeastern region of Brazil. *Semin Ophthalmol*. 2018; 33(3):357-360.
301. Beiguelman B. A survey on genetical and anthropological traits among Japanese immigrants in Brazil. *Z Morphol Anthropol*. 1964; 55(1):46-59.
